# Supplementary material for: Identification of New N-methyl-piperazine Chalcones as Dual MAO-B/AChE Inhibitors
Source: MDPI journal article supplement (doi:10.3390/ph16010083), 2023-01-06
Supplement: s1 [file s1]

# Supplementary Information

## Identification of New *N*-methyl-piperazine Chalcones as Dual MAO-B/AChE Inhibitors

Ashraf K. El-Damasy <sup>1,2,\*†</sup>, Jong Eun Park <sup>3,†</sup>, Hyun Ji Kim <sup>1</sup>, Jinhyuk Lee <sup>4,5</sup>, Eun-Kyoung Bang <sup>1</sup>, Hoon Kim <sup>3,\*</sup> and Gyochang Keum <sup>1,\*</sup>

<sup>1</sup> Center for Brain Technology, Brain Science Institute, Korea Institute of Science and Technology (KIST), Seoul 02792, Republic of Korea; hjkim926@kist.re.kr (H.J.K.); eunkbang@kist.re.kr (E.-K.B.)

<sup>2</sup> Department of Medicinal Chemistry, Faculty of Pharmacy, Mansoura University, Mansoura 35516, Egypt

<sup>3</sup> Department of Pharmacy, and Research Institute of Life Pharmaceutical Sciences, Suncheon National University, Suncheon 57922, Republic of Korea; park140201@naver.com

<sup>4</sup> Disease Target Structure Research Center, Korea Research Institute of Bioscience and Biotechnology (KRIBB), Daejeon 34141, Republic of Korea; jinhyuk@kribb.re.kr

<sup>5</sup> Department of Bioinformatics, KRIBB School of Bioscience, University of Science and Technology (UST), Daejeon 34113, Republic of Korea

\* Correspondence: ashraf.el-damasy@kist.re.kr (A.K.E.-D.); hoon@sunchon.ac.kr (H.K.); gkeum@kist.re.kr (G.K.)

† These authors contributed equally to this work.

| Contents                                                                    | Pages |
|-----------------------------------------------------------------------------|-------|
| Figure S1. <sup>1</sup> H NMR and <sup>13</sup> C NMR spectra               | 2–18  |
| Figure S2. HRMS charts                                                      | 19–35 |
| Figure S3. IR spectra                                                       | 36–44 |
| Figure S4. IC <sub>50</sub> curves of <b>2k</b> and <b>2n</b> against MAO-B | 45    |

Figure S1.  $^1\text{H}$  NMR and  $^{13}\text{C}$  NMR spectra

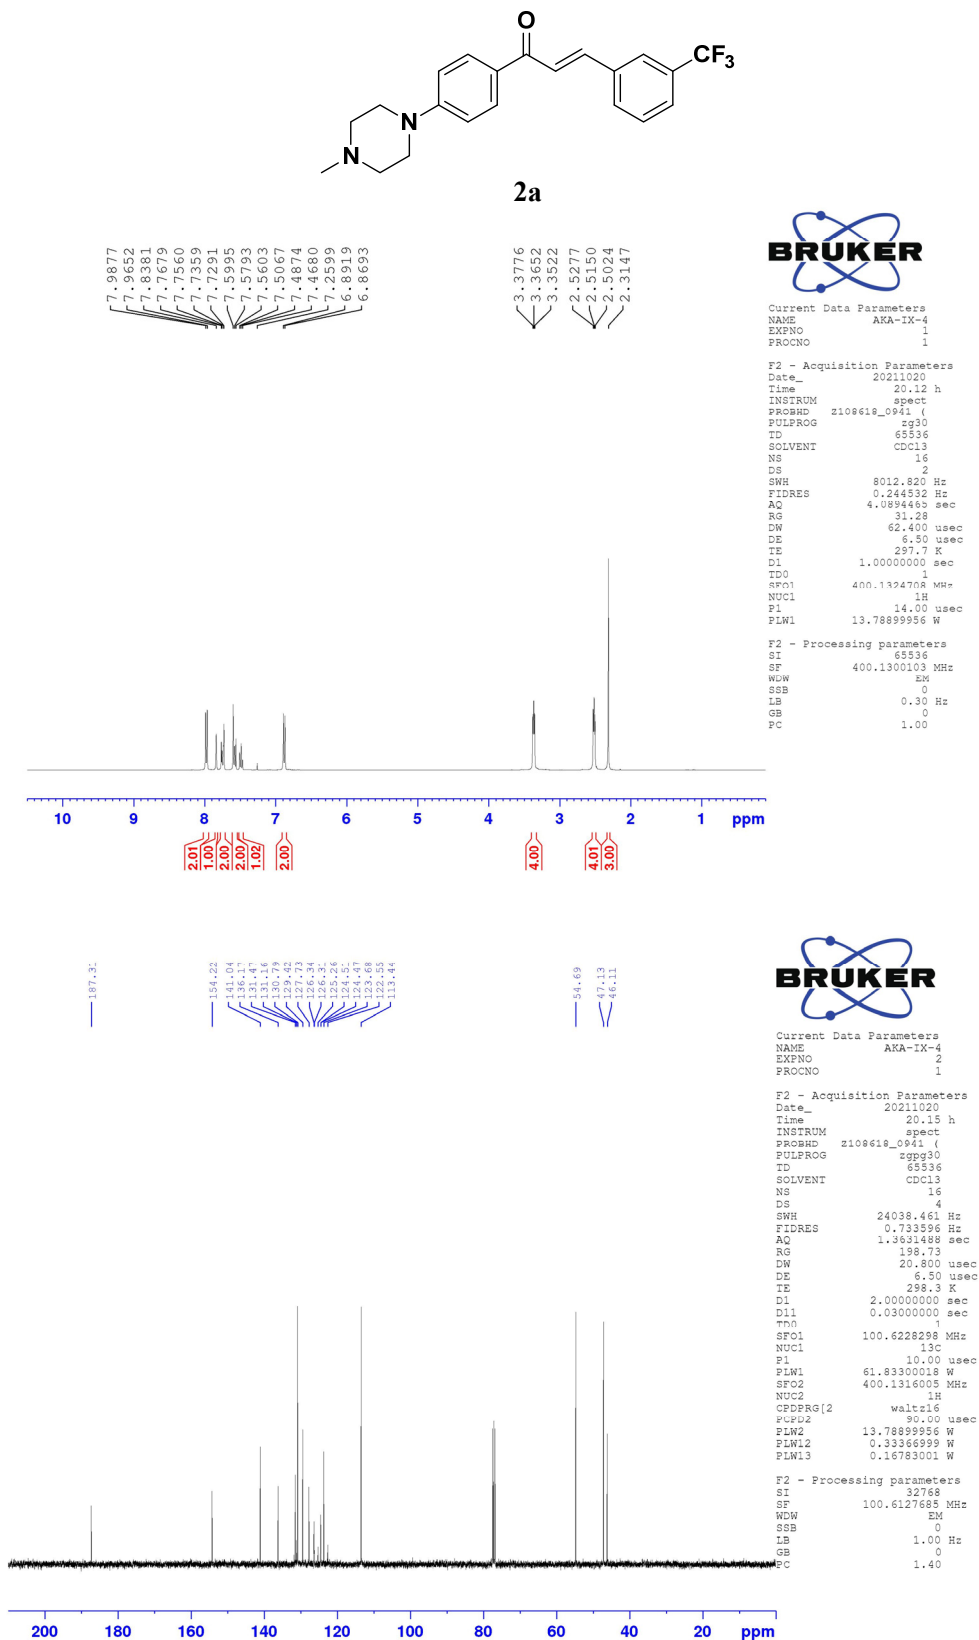

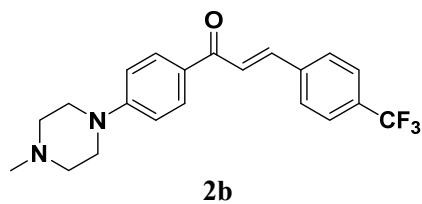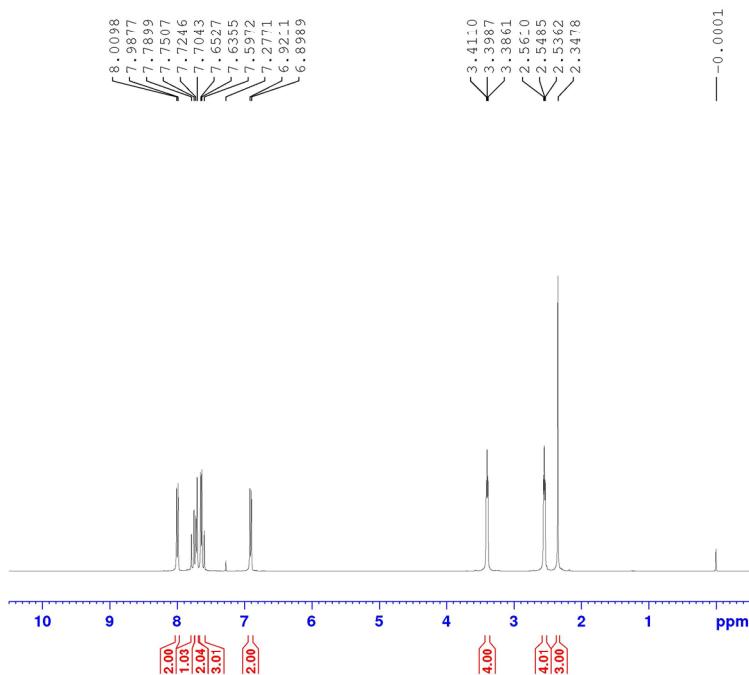

**BRUKER**

Current Data Parameters  
NAME AKA-IX-20  
EXPNO 1  
PROCNO 1

F2 - Acquisition Parameters  
Date\_ 20211115  
Time 11.49  
INSTRUM spect  
PROBHD 5 mm PABBO ss/  
PULPROG zg30  
TD 65536  
SOLVENT CDCl<sub>3</sub>  
NS 16  
DS 2  
SWH 8012.820 Hz  
FIDRES 0.122266 Hz  
AQ 4.0894465 sec  
RG 52.97  
DW 62.400 usec  
DE 6.50 usec  
TE 297.7 K  
D1 1.00000000 sec  
TD0 1

===== CHANNEL f1 =====  
SFO1 400.2124715 MHz  
NUC1 1H  
P1 16.00 usec  
PLW1 13.00000000 W

F2 - Processing parameters  
SI 65536  
SF 400.2100062 MHz  
WDW EM  
SSB 0  
LB 0.30 Hz  
GB 0  
PC 1.00

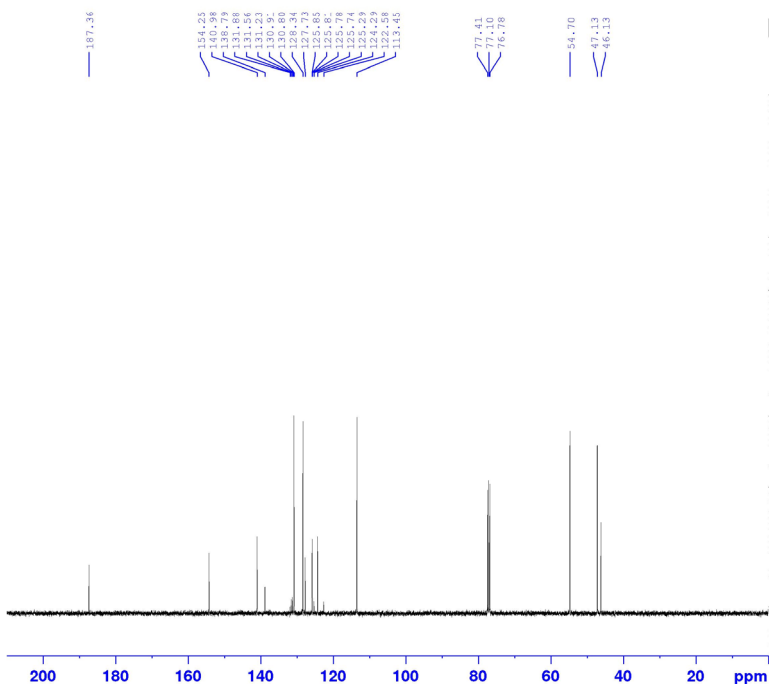

**BRUKER**

Current Data Parameters  
NAME AKA-IX-20  
EXPNO 2  
PROCNO 1

F2 - Acquisition Parameters  
Date\_ 20211115  
Time 11.53  
INSTRUM spect  
PROBHD 5 mm PABBO ss/  
PULPROG zgpg30  
TD 65536  
SOLVENT CDCl<sub>3</sub>  
NS 50  
DS 4  
SWH 24038.461 Hz  
FIDRES 0.366798 Hz  
AQ 1.3631488 sec  
RG 190.62  
DW 20.800 usec  
DE 6.50 usec  
TE 297.9 K  
D1 2.00000000 sec  
D11 0.03000000 sec  
TD0 1

===== CHANNEL f1 =====  
SFO1 100.6429474 MHz  
NUC1 13C  
P1 10.00 usec  
PLW1 65.00000000 W

===== CHANNEL f2 =====  
SFO2 400.2116008 MHz  
NUC2 1H  
CPDPRG2 waltz16  
PCPD2 90.00 usec  
PLW2 13.00000000 W  
PLW12 0.36111000 W  
PLW13 0.29249999 W

F2 - Processing parameters  
SI 32768  
SF 100.6328850 MHz  
WDW EM  
SSB 0  
LB 1.00 Hz  
GB 0  
PC 1.40

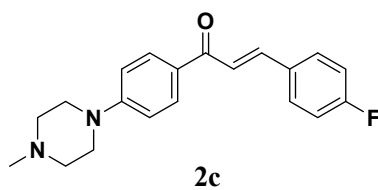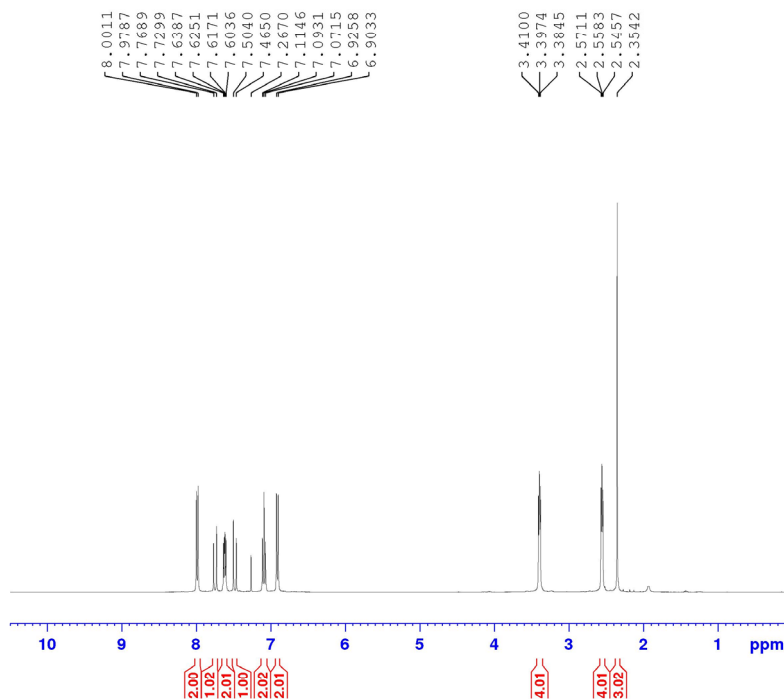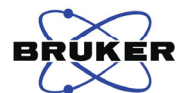

Current Data Parameters  
NAME AKA-IX-19  
EXPNO 1  
PROCNO 1

F2 - Acquisition Parameters  
Date\_ 20211115  
Time 11.35  
INSTRUM spect  
PROBHD 5 mm PABBO BB/  
PULPROG zg30  
TD 65536  
SOLVENT CDCl3  
NS 16  
DS 2  
SWH 8012.820 Hz  
FIDRES 0.122266 Hz  
AQ 4.089468 sec  
RG 91.91  
DW 62.400 usec  
DE 6.50 usec  
TE 297.7 K  
D1 1.00000000 sec  
TD0 1

===== CHANNEL f1 =====  
SFO1 400.2124715 MHz  
NUC1 1H  
P1 16.00 usec  
PLW1 13.00000000 W

F2 - Processing parameters  
SI 65536  
SF 400.2100102 MHz  
WDW EM  
SSB 0  
LB 0.30 Hz  
GB 0  
PC 1.00

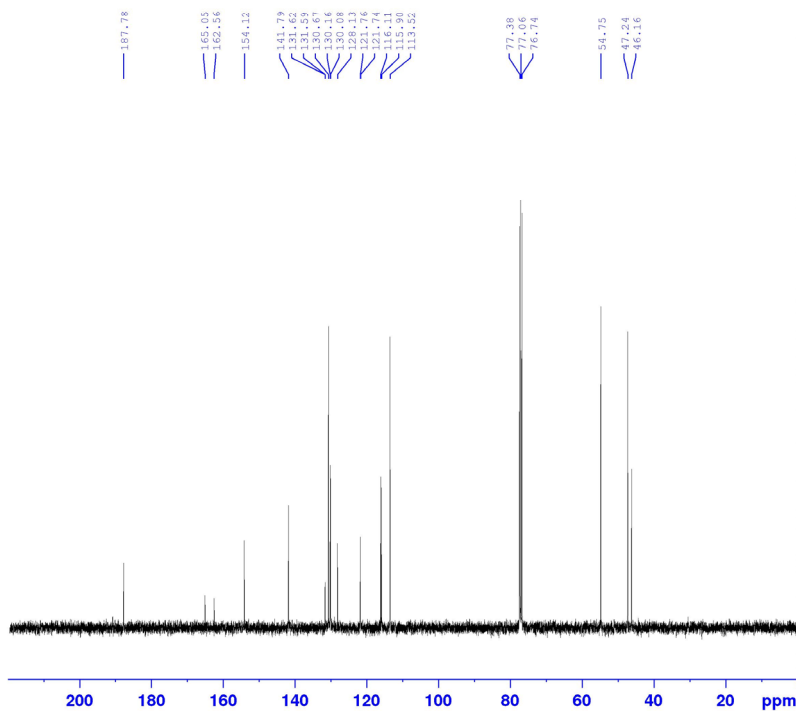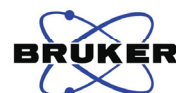

Current Data Parameters  
NAME AKA-IX-19  
EXPNO 2  
PROCNO 1

F2 - Acquisition Parameters  
Date\_ 20211115  
Time 11.43  
INSTRUM spect  
PROBHD 5 mm PABBO BB/  
PULPROG zgpg30  
TD 65536  
SOLVENT CDCl3  
NS 100  
DS 4  
SWH 24038.461 Hz  
FIDRES 0.366798 Hz  
AQ 1.3631488 sec  
RG 130.62  
DW 20.800 usec  
DE 6.50 usec  
TE 297.9 K  
D1 2.00000000 sec  
D11 0.03000000 sec  
TD0 1

===== CHANNEL f1 =====  
SFO1 100.6429474 MHz  
NUC1 13C  
P1 10.00 usec  
PLW1 65.00000000 W

===== CHANNEL f2 =====  
SFO2 400.2116008 MHz  
NUC2 1H  
CPDPRG2 waltz16  
PCPD2 90.00 usec  
PLW2 13.00000000 W  
PLW12 0.36110000 W  
PLW13 0.29249999 W

F2 - Processing parameters  
SI 32768  
SF 100.6328850 MHz  
WDW EM  
SSB 0  
LB 1.00 Hz  
GB 0  
PC 1.40



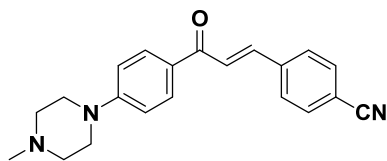

2d

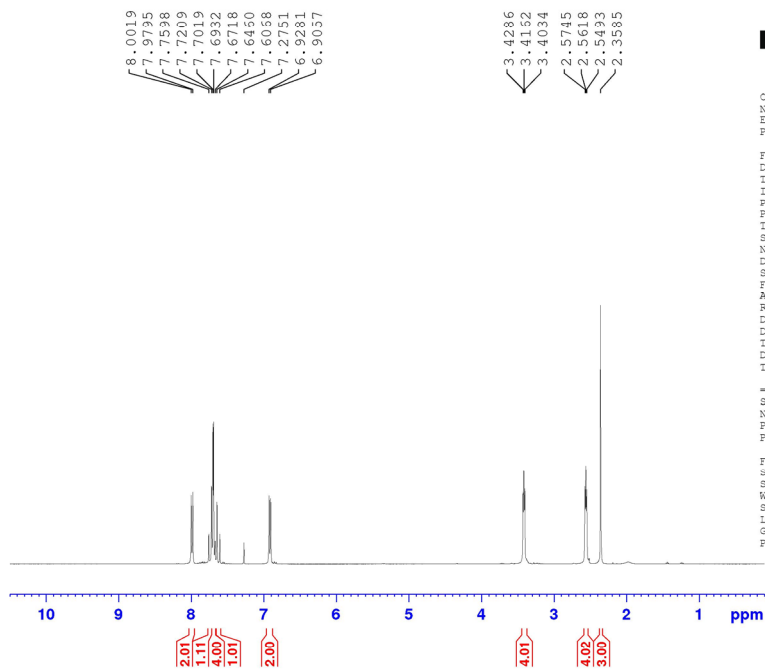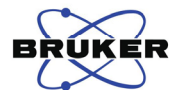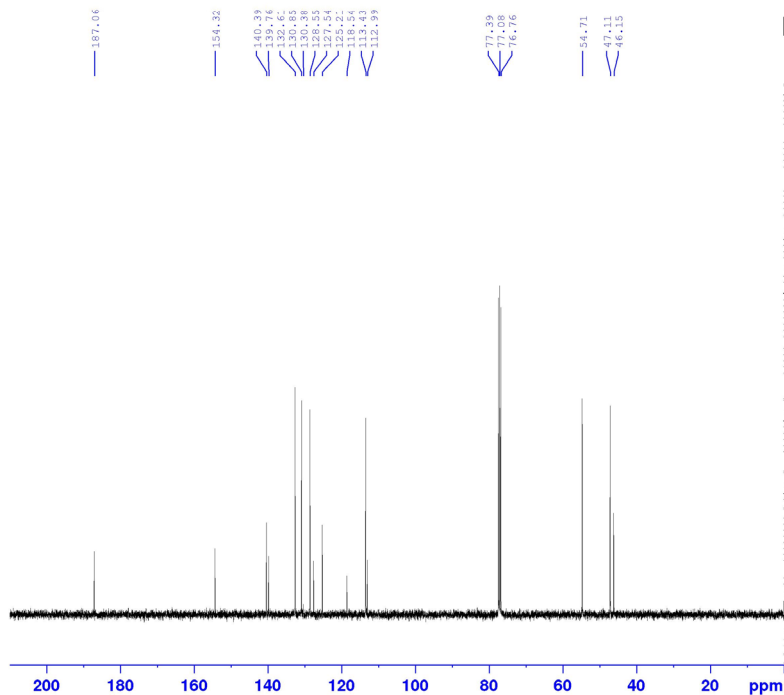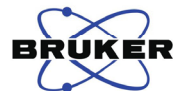

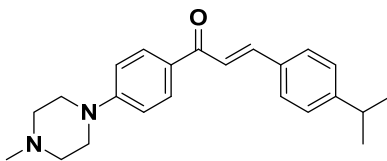

2e

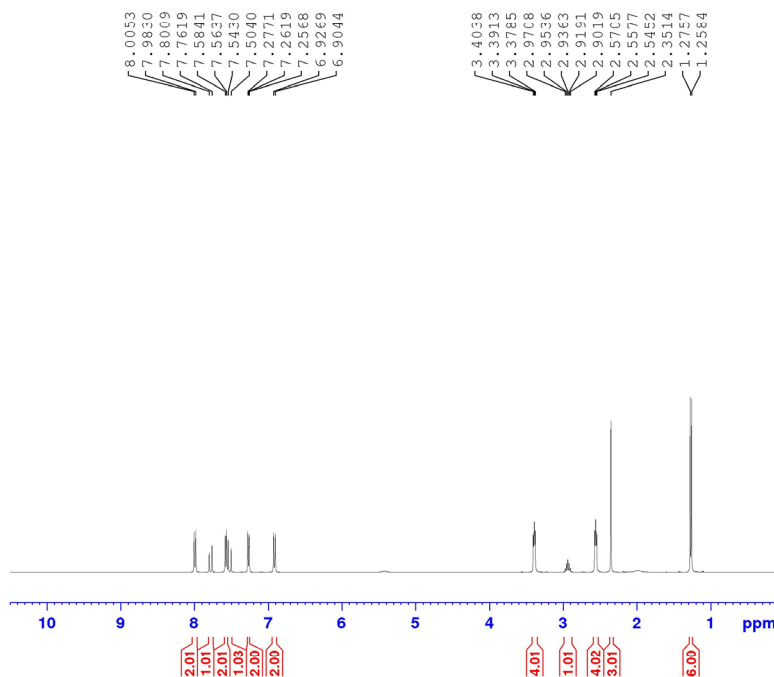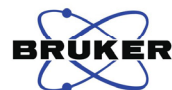

Current Data Parameters  
NAME AKA-VIII-92  
EXPNO 1  
PROCNO 1

F2 - Acquisition Parameters  
Date\_ 20211011  
Time 13.38  
INSTRUM spect  
PROBHD 5 mm PABBO BB/  
PULPROG zg30  
TD 65536  
SOLVENT CDCl3  
NS 16  
DS 2  
SWH 8012.820 Hz  
FIDRES 0.122266 Hz  
AQ 4.0894460 sec  
RG 84.76  
DW 62.400 usec  
DE 6.50 usec  
TE 297.2 K  
D1 1.0000000 sec  
TD0 1

===== CHANNEL f1 =====  
SFO1 400.2124715 MHz  
NUC1 1H  
P1 16.00 usec  
PLW1 13.00000000 W

F2 - Processing parameters  
SI 65536  
SF 400.2100123 MHz  
WDW EM  
SSB 0  
LB 0.30 Hz  
GB 0  
PC 1.00

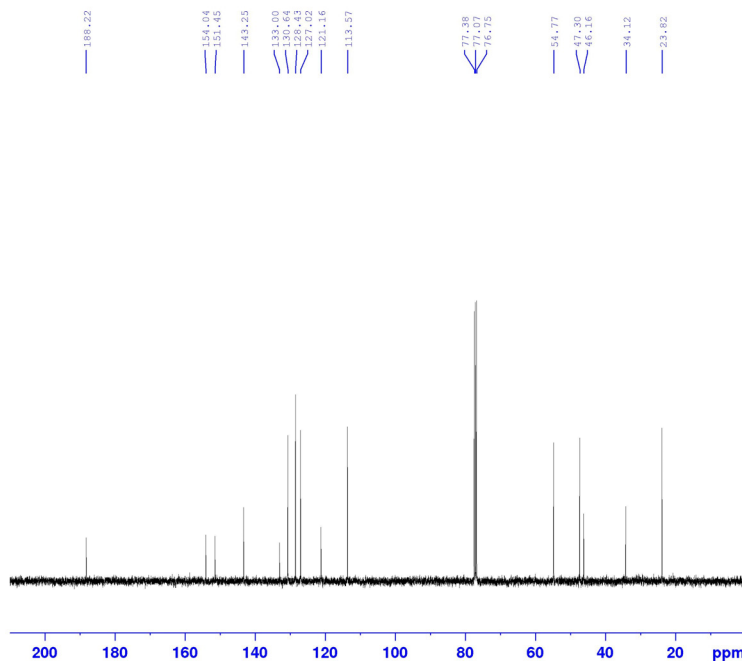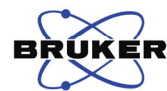

Current Data Parameters  
NAME AKA-VIII-92  
EXPNO 2  
PROCNO 1

F2 - Acquisition Parameters  
Date\_ 20211011  
Time 13.42  
INSTRUM spect  
PROBHD 5 mm PABBO BB/  
PULPROG zgpg30  
TD 65536  
SOLVENT CDCl3  
NS 50  
DS 4  
SWH 24038.461 Hz  
FIDRES 0.366798 Hz  
AQ 1.3631488 sec  
RG 190.62  
DW 20.800 usec  
DE 6.50 usec  
TE 297.9 K  
D1 2.0000000 sec  
D11 0.03000000 sec  
TD0 1

===== CHANNEL f1 =====  
SFO1 100.6429474 MHz  
NUC1 13C  
P1 10.00 usec  
PLW1 65.00000000 W

===== CHANNEL f2 =====  
SFO2 400.2116008 MHz  
NUC2 1H  
CPDPRG2 waltz16  
PCPD2 90.00 usec  
PLW2 13.00000000 W  
PLW12 0.36111000 W  
PLW13 0.29249999 W

F2 - Processing parameters  
SI 32768  
SF 100.6328850 MHz  
WDW EM  
SSB 0  
LB 1.00 Hz  
GB 0  
PC 1.40

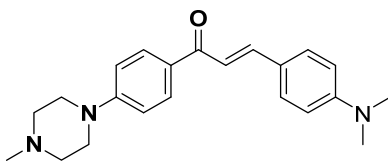

2f

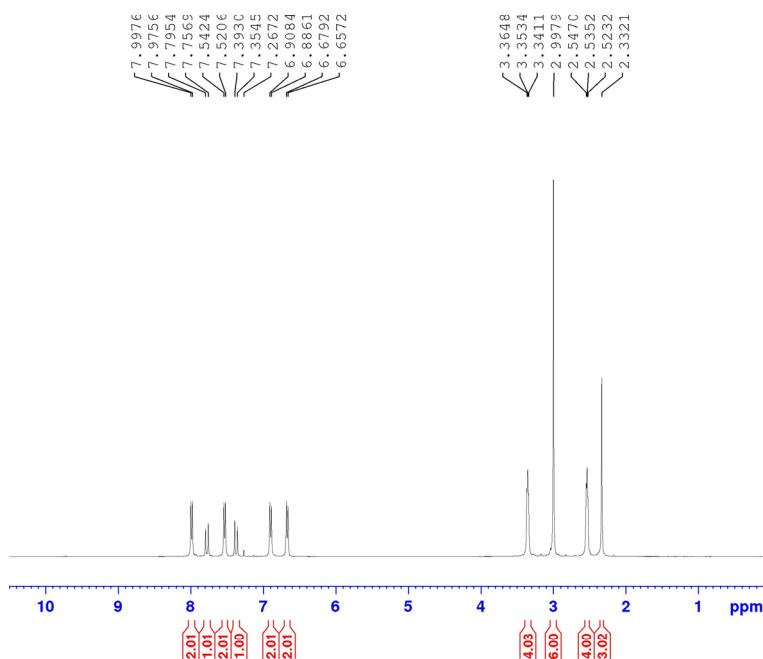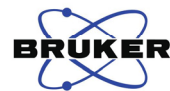

Current Data Parameters  
NAME AKA-VIII-100-after wash  
EXTNO 10  
PROCNO 1

F2 - Acquisition Parameters  
Date\_ 20211027  
Time 21.33  
INSTRUM spect  
PROBHD 5 mm PABBO BB/  
PULPROG zg30  
TD 63536  
SOLVENT CDCl3  
NS 16  
DS 2  
SWH 8012.820 Hz  
FIDRES 0.122266 Hz  
AQ 4.0894465 sec  
RG 33.2  
TW 62.400 usec  
DE 6.50 usec  
TE 296.8 K  
D1 1.00000000 sec  
TD0 1

===== CHANNEL f1 =====  
SFO1 400.2124715 MHz  
NUC1 1H  
P1 16.00 usec  
PLW1 13.00000000 W

F2 - Processing parameters  
SI 65536  
SF 400.2100098 MHz  
WDW EM  
SSB 0  
LB 0.30 Hz  
GB 0  
PC 1.00

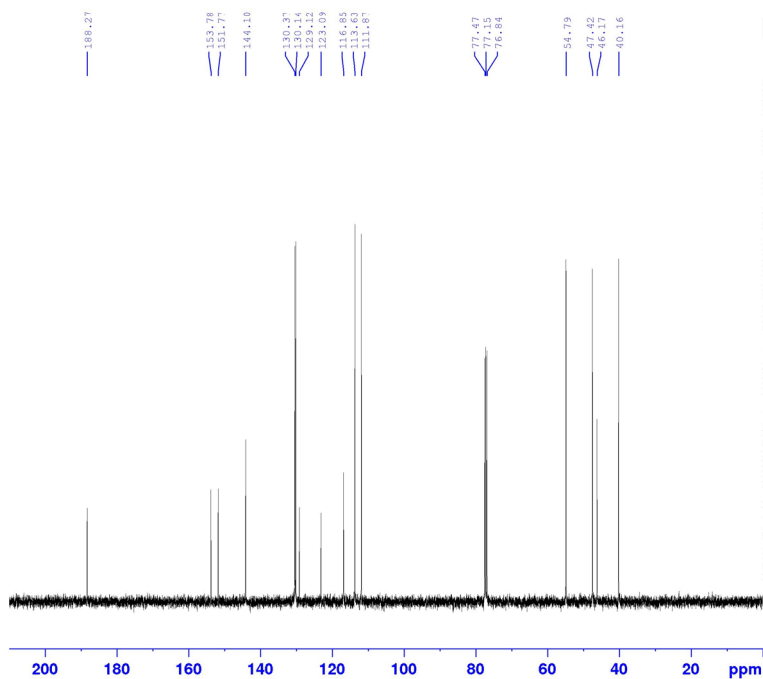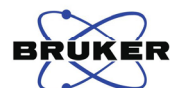

Current Data Parameters  
NAME AKA-VIII-100-after wash  
EXTNO 11  
PROCNO 1

F2 - Acquisition Parameters  
Date\_ 20211027  
Time 21.38  
INSTRUM spect  
PROBHD 5 mm PABBO BB/  
PULPROG zgpg30  
TD 65536  
SOLVENT CDCl3  
NS 50  
DS 4  
SWH 24038.461 Hz  
FIDRES 0.366798 Hz  
AQ 1.3631488 sec  
RG 190.62  
RW 20.800 usec  
DE 6.50 usec  
TE 297.5 K  
D1 2.00000000 sec  
D11 0.03000000 sec  
TD0 1

===== CHANNEL f1 =====  
SFO1 100.6429474 MHz  
NUC1 13C  
P1 10.00 usec  
PLW1 65.00000000 W

===== CHANNEL f2 =====  
SFO2 400.2116008 MHz  
NUC2 1H  
CPDPRG2 waltz16  
PCPD2 90.00 usec  
PLW2 13.00000000 W  
PLW12 0.36111000 W  
PLW13 0.29249999 W

F2 - Processing parameters  
SI 32768  
SF 100.6328850 MHz  
WDW EM  
SSB 0  
LB 1.00 Hz  
GB 0  
PC 1.40

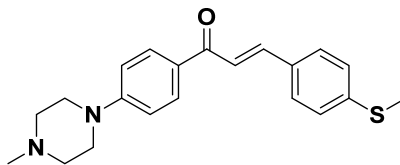

2g

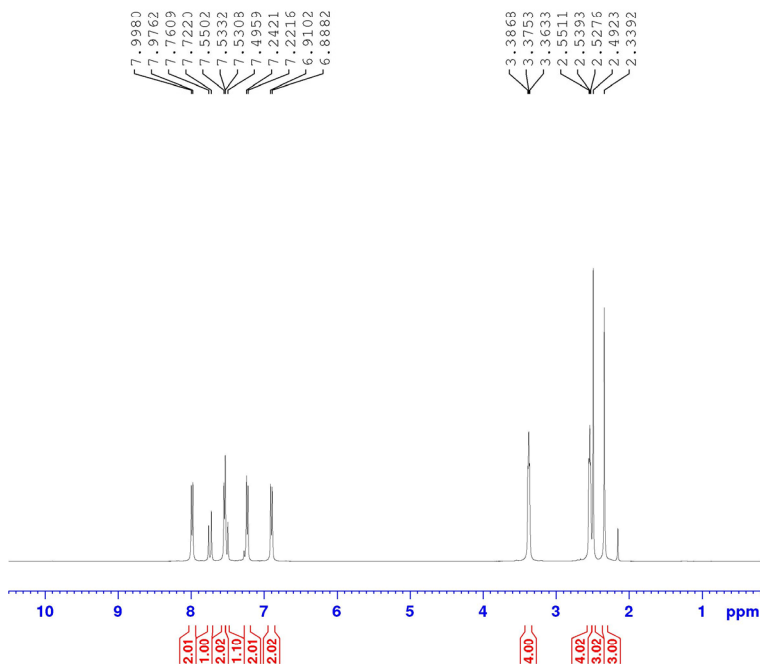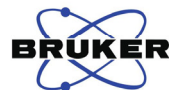

Current Data Parameters  
NAME AKA-VIII-93  
EXPNO 1  
PROCNO 1

F2 - Acquisition Parameters  
Date\_ 20211020  
Time 15.37  
INSTRUM spect  
PROBHD 5 mm PABBO BB/  
PULPROG zg30  
TD 65536  
SOLVENT CDCl<sub>3</sub>  
NS 16  
DS 2  
SWH 8012.820 Hz  
FIDRES 0.122266 Hz  
AQ 4.0894463 sec  
RG 52.97  
DW 62.400 usec  
DE 6.50 usec  
TE 297.0 K  
D1 1.00000000 sec  
TD0 1

===== CHANNEL f1 =====  
SFO1 400.2124715 MHz  
NUC1 1H  
P1 16.00 usec  
PLW1 13.00000000 W

F2 - Processing parameters  
SI 65536  
SF 400.2100068 MHz  
WDW EM  
SSB 0  
LB 0.30 Hz  
GB 0  
PC 1.00

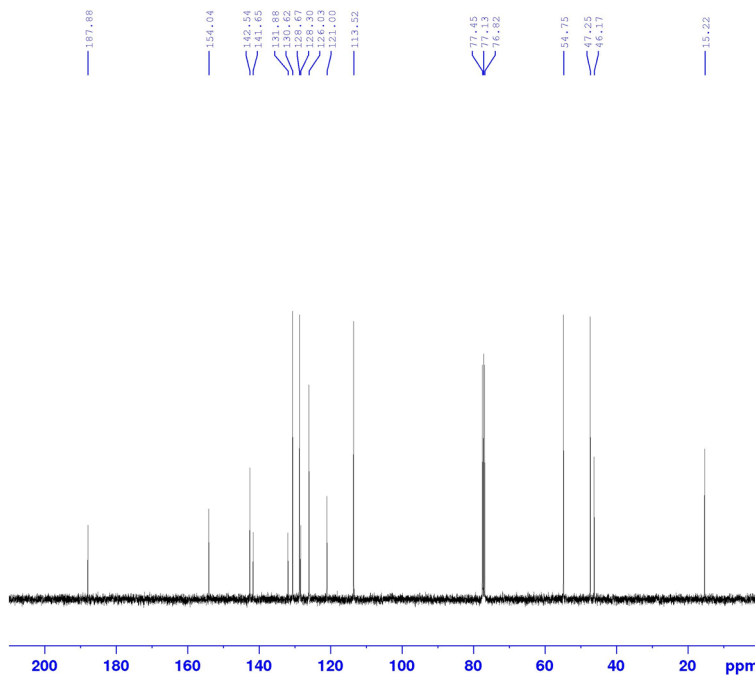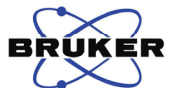

Current Data Parameters  
NAME AKA-VIII-93  
EXPNO 2  
PROCNO 1

F2 - Acquisition Parameters  
Date\_ 20211020  
Time 15.42  
INSTRUM spect  
PROBHD 5 mm PABBO BB/  
PULPROG zgpg30  
TD 65536  
SOLVENT CDCl<sub>3</sub>  
NS 50  
DS 4  
SWH 24038.461 Hz  
FIDRES 0.365798 Hz  
AQ 1.3631488 sec  
RG 190.62  
DW 20.800 usec  
DE 6.50 usec  
TE 297.7 K  
D1 2.00000000 sec  
D11 0.03000000 sec  
TD0 1

===== CHANNEL f1 =====  
SFO1 100.6429474 MHz  
NUC1 13C  
P1 10.00 usec  
PLW1 65.00000000 W

===== CHANNEL f2 =====  
SFO2 400.2116008 MHz  
NUC2 1H  
PCPDG[2] waltz16  
PCPD2 90.00 usec  
PLW2 13.00000000 W  
PLW12 0.3611000 W  
PLW13 0.29249999 W

F2 - Processing parameters  
SI 32768  
SF 100.6328850 MHz  
WDW EM  
SSB 0  
LB 1.00 Hz  
GB 0  
PC 1.40

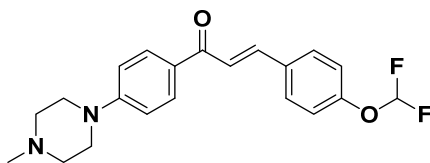

2h

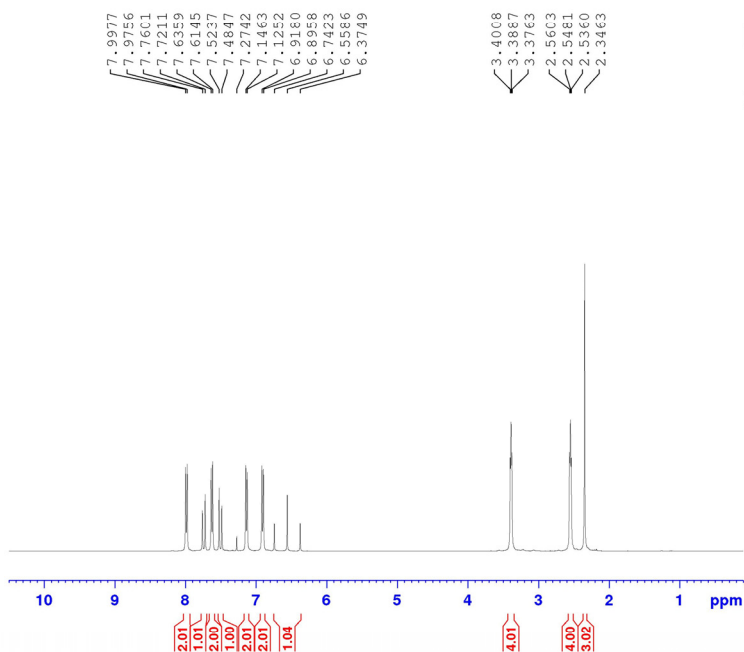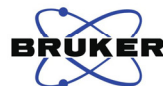

Current Data Parameters  
 NAME AKA-IX-2  
 EXPNO 1  
 PROCNO 1  
 F2 - Acquisition Parameters  
 Date\_ 20211021  
 Time 12.50  
 INSTRUM spect  
 PROBHD 5 mm PABBO BB/  
 PULPROG zg30  
 TD 65536  
 SOLVENT CDCl3  
 NS 16  
 DS 2  
 SWH 8012.820 Hz  
 FIDRES 0.122266 Hz  
 AQ 4.0894465 sec  
 RG 58.64  
 DW 62.400 usec  
 DE 6.50 usec  
 TE 296.9 K  
 D1 1.00000000 sec  
 TDO 1

===== CHANNEL f1 =====  
 SFO1 400.2124715 MHz  
 NUC1 1H  
 P1 16.00 usec  
 PLW1 13.00000000 W

F2 - Processing parameters  
 SI 85536  
 SF 400.2100073 MHz  
 WDW EM  
 SSB 0  
 LB 0.30 Hz  
 GB 0  
 PC 1.00

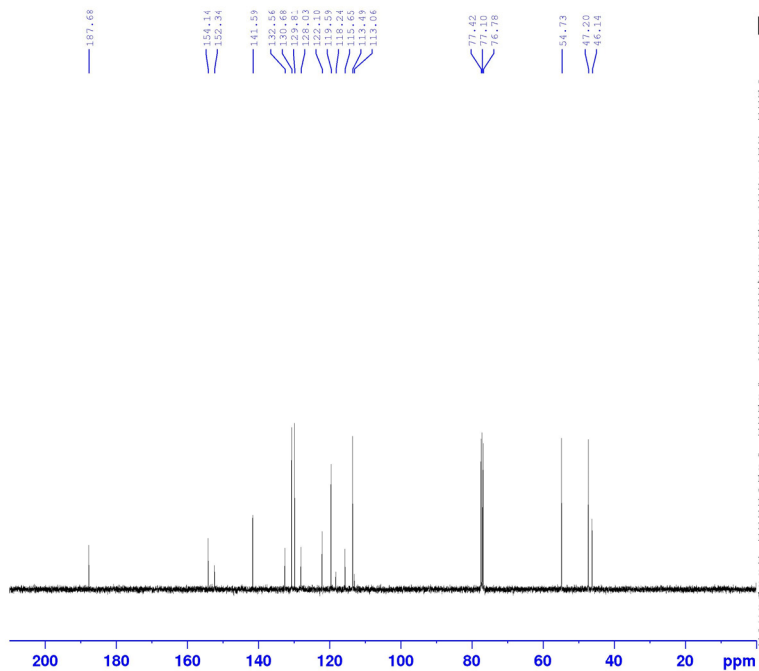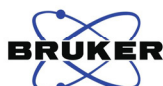

Current Data Parameters  
 NAME AKA-IX-2  
 EXPNO 2  
 PROCNO 1

F2 - Acquisition Parameters  
 Date\_ 20211021  
 Time 12.53  
 INSTRUM spect  
 PROBHD 5 mm PABBO BB/  
 PULPROG zgpg30  
 TD 65536  
 SOLVENT CDCl3  
 NS 30  
 DS 4  
 SWH 24038.461 Hz  
 FIDRES 0.366798 Hz  
 AQ 1.3631488 sec  
 RG 190.62  
 DW 20.800 usec  
 DE 6.50 usec  
 TE 297.4 K  
 D1 2.00000000 sec  
 D11 0.03000000 sec  
 TDO 1

===== CHANNEL f1 =====  
 SFO1 100.6229474 MHz  
 NUC1 13C  
 P1 10.00 usec  
 PLW1 65.00000000 W

===== CHANNEL f2 =====  
 SFO2 400.2116008 MHz  
 NUC2 1H  
 CPDPRG2 waltz16  
 PCPD2 90.00 usec  
 PLW2 13.00000000 W  
 PLW12 0.36111000 W  
 PLW13 0.29249999 W

F2 - Processing parameters  
 SI 32768  
 SF 100.6228850 MHz  
 WDW EM  
 SSB 0  
 LB 1.00 Hz  
 GB 0  
 PC 1.40

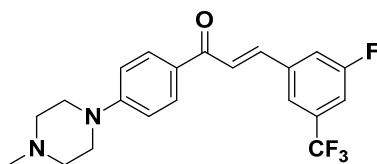

2i

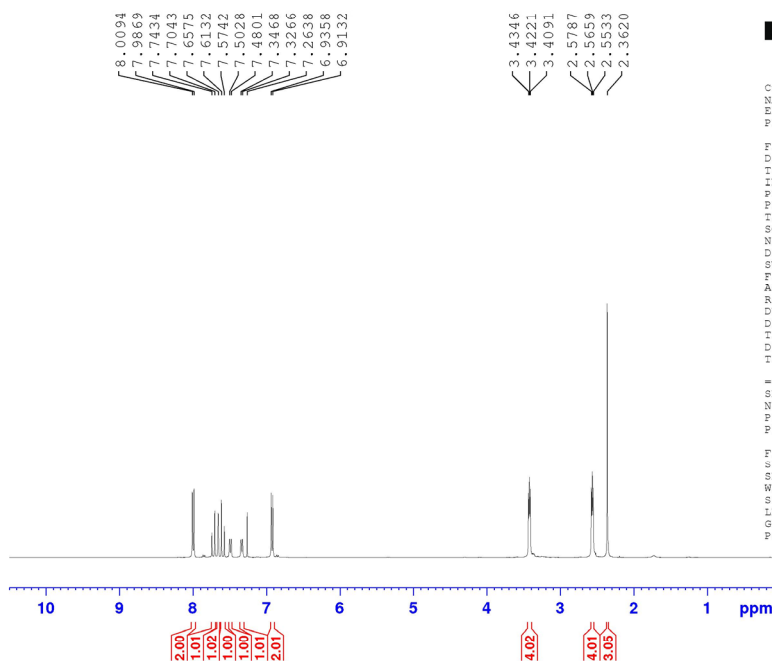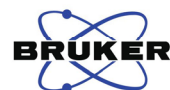

Current Data Parameters  
NAME AKA-VIII-23  
EXPNO 1  
PROCNO 1

F2 - Acquisition Parameters  
Date\_ 20210302  
Time 11.59  
INSTRUM spect  
PROBHD 5 mm PASSO BB/  
PULPROG zg30  
TD 65536  
SOLVENT CDCl3  
NS 16  
DS 2  
SWH 8012.820 Hz  
FIDRES 0.122266 Hz  
AQ 4.0894463 sec  
RG 146.31  
DW 62.400 usec  
DE 6.50 usec  
TE 297.9 K  
D1 1.00000000 sec  
TD0 1

===== CHANNEL f1 =====  
SFO1 400.2124715 MHz  
NUC1 1H  
P1 15.54 usec  
PLW1 12.00000000 W

F2 - Processing parameters  
SI 65536  
SF 400.2100116 MHz  
WDW EM  
SSB 0  
LB 0.30 Hz  
GB 0  
PC 1.00

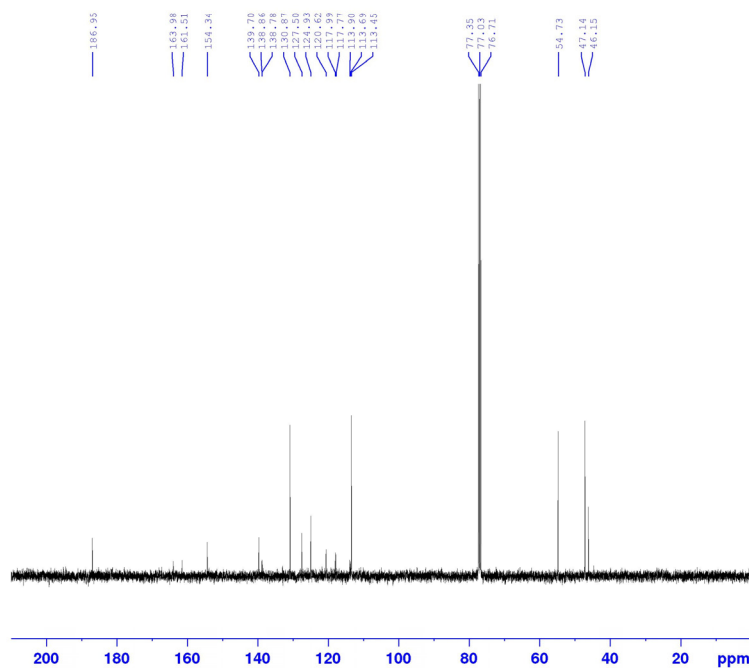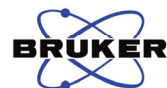

Current Data Parameters  
NAME AKA-VIII-23  
EXPNO 2  
PROCNO 1

F2 - Acquisition Parameters  
Date\_ 20210302  
Time 12.09  
INSTRUM spect  
PROBHD 5 mm PASSO BB/  
PULPROG zgpg30  
TD 65536  
SOLVENT CDCl3  
NS 150  
DS 4  
SWH 24038.461 Hz  
FIDRES 0.366798 Hz  
AQ 1.3631488 sec  
RG 190.62  
DW 20.800 usec  
DE 6.50 usec  
TE 298.6 K  
D1 2.00000000 sec  
D11 0.03000000 sec  
TD0 1

===== CHANNEL f1 =====  
SFO1 100.6429474 MHz  
NUC1 13C  
P1 10.00 usec  
PLW1 52.00000000 W

===== CHANNEL f2 =====  
SFO2 400.2116008 MHz  
NUC2 1H  
CPDPRG2 waltz16  
PCPD2 90.00 usec  
PLW2 12.00000000 W  
PLW12 0.35777000 W  
PLW13 0.28979000 W

F2 - Processing parameters  
SI 32768  
SF 100.6328850 MHz  
WDW EV  
SSB 0  
LB 1.00 Hz  
GB 0  
PC 1.40

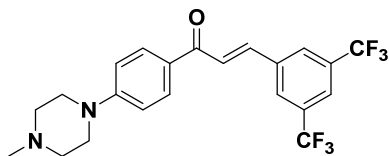

2j

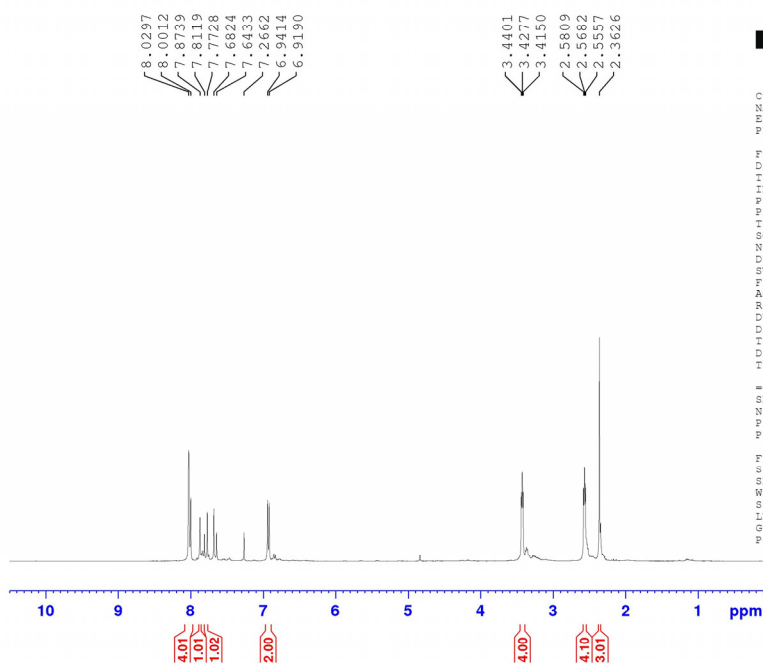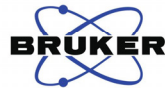

Current Data Parameters  
NAME AKA-VIII-25  
EXPNO 1  
PROCNO 1

F2 - Acquisition Parameters  
Date\_ 20210302  
Time 12.13  
INSTRUM spect  
PROBHD 5 mm PABBO BB/  
PULPROG zgpg30  
TD 65536  
SOLVENT CDCl<sub>3</sub>  
NS 16  
DS 2  
SWH 8012.820 Hz  
FIDRES 0.122266 Hz  
AQ 4.0894460 sec  
RG 103.95  
DW 62.400 usec  
DE 6.50 usec  
TE 297.9 K  
D1 1.00000000 sec  
TDO 1

===== CHANNEL f1 =====  
SFO1 400.2124715 MHz  
NUC1 1H  
P1 15.54 usec  
PLW1 12.00000000 W

F2 - Processing parameters  
SI 65536  
SF 400.2100111 MHz  
WDW EM  
SSB 0  
LB 0.30 Hz  
GB 0  
PC 1.00

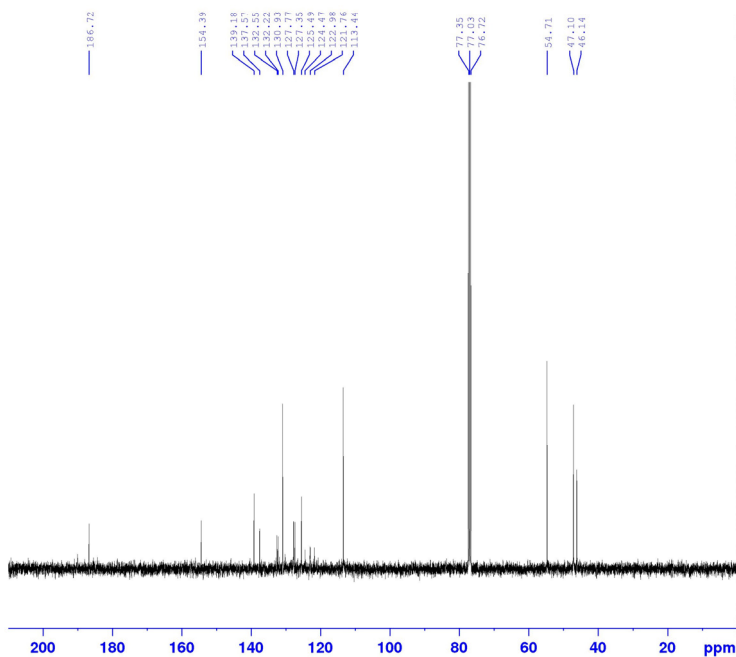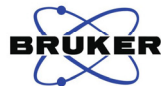

Current Data Parameters  
NAME AKA-VIII-25  
EXPNO 2  
PROCNO 1

F2 - Acquisition Parameters  
Date\_ 20210302  
Time 12.20  
INSTRUM spect  
PROBHD 5 mm PABBO BB/  
PULPROG zgpg30  
TD 65536  
SOLVENT CDCl<sub>3</sub>  
NS 100  
DS 4  
SWH 24038.461 Hz  
FIDRES 0.366798 Hz  
AQ 1.3633488 sec  
RG 190.62  
DW 20.800 usec  
DE 6.50 usec  
TE 298.9 K  
D1 2.00000000 sec  
D11 0.03000000 sec  
TDO 1

===== CHANNEL f1 =====  
SFO1 100.6428474 MHz  
NUC1 13C  
P1 10.00 usec  
PLW1 52.00000000 W

===== CHANNEL f2 =====  
SFO2 400.216008 MHz  
NUC2 1H  
CPDPRG2 waltz16  
PCPD2 90.00 usec  
PLW2 12.00000000 W  
PLW12 0.35777000 W  
PLW13 0.28979000 W

F2 - Processing parameters  
SI 32768  
SF 100.6328850 MHz  
WDW EM  
SSB 0  
LB 1.00 Hz  
GB 0  
PC 1.40

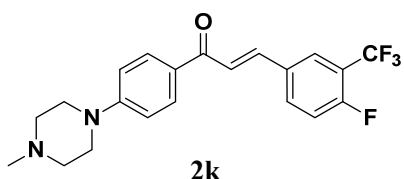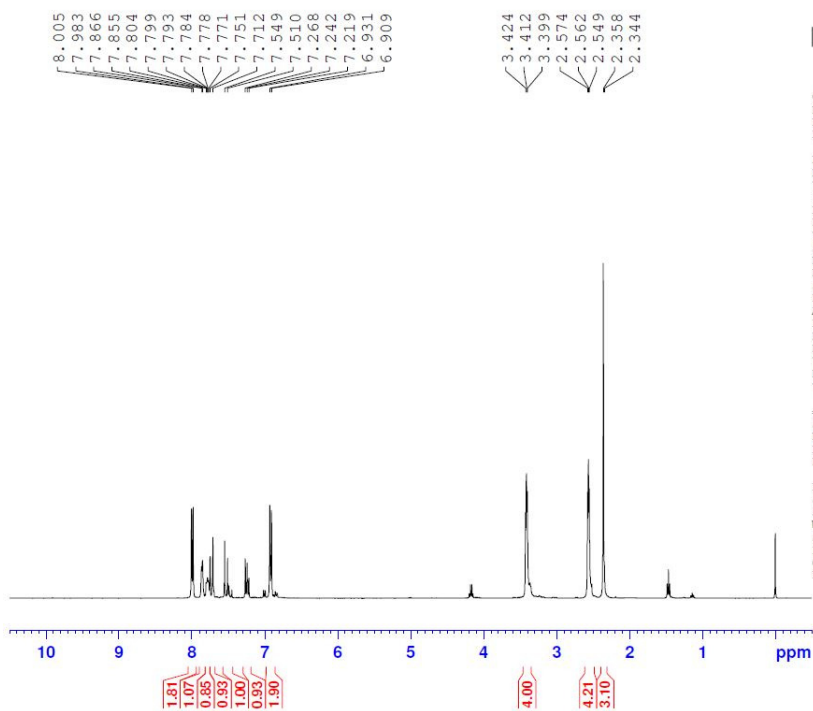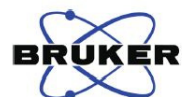

Current Data Parameters  
NAME AKA-VIII-27  
EXPNO 1  
PROCNO 1

F2 - Acquisition Parameters  
Date\_ 20210209  
Time 18.12  
INSTRUM spect  
PROBHD 5 mm PABBO BB/  
PULPROG zg30  
TD 65536  
SOLVENT CDCl<sub>3</sub>  
NS 5  
DS 2  
SWH 8012.820 Hz  
FIDRES 0.122266 Hz  
AQ 4.0894465 sec  
RG 91.91  
DW 62.400 usec  
DE 6.50 usec  
TE 298.2 K  
D1 1.00000000 sec  
TD0 1

===== CHANNEL f1 =====  
SFO1 400.2124715 MHz  
NUC1 1H  
P1 15.54 usec  
PLW1 12.00000000 W

F2 - Processing parameters  
SI 65536  
SF 400.2100100 MHz  
WDW EM  
SSB 0  
LB 0.30 Hz  
GB 0  
PC 1.00

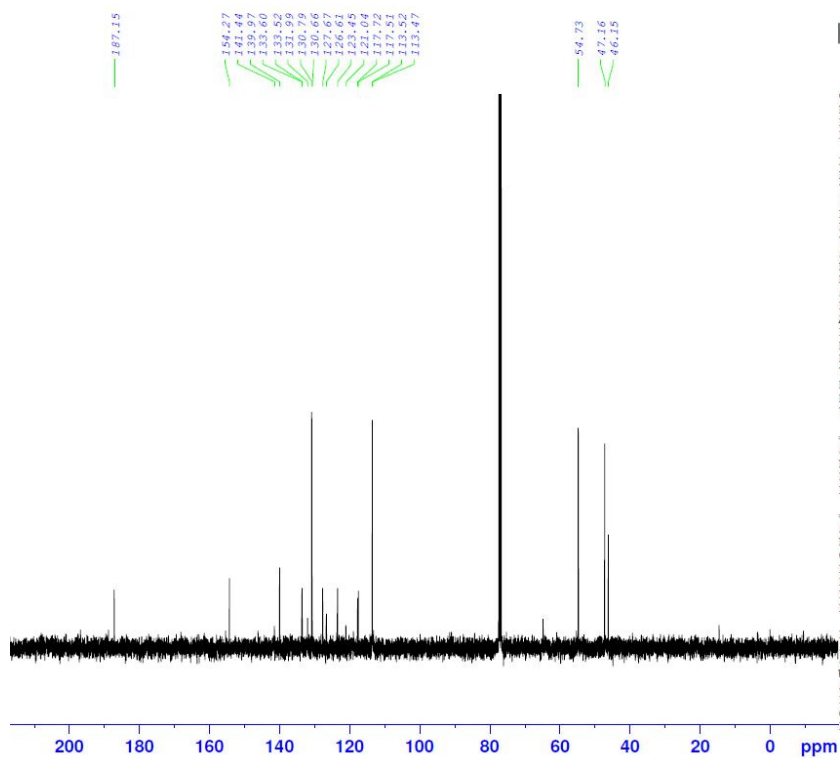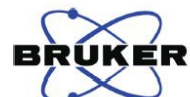

Current Data Parameters  
NAME AKA-VIII-27  
EXPNO 2  
PROCNO 1

F2 - Acquisition Parameters  
Date\_ 20210209  
Time 18.16  
INSTRUM spect  
PROBHD 5 mm PABBO BB/  
PULPROG zgpg30  
TD 65536  
SOLVENT CDCl<sub>3</sub>  
NS 40  
DS 4  
SWH 24038.461 Hz  
FIDRES 0.366798 Hz  
AQ 1.3631488 sec  
RG 190.62  
DW 20.800 usec  
DE 6.50 usec  
TE 298.9 K  
D1 2.00000000 sec  
D11 0.03000000 sec  
TD0 1

===== CHANNEL f1 =====  
SFO1 100.6429474 MHz  
NUC1 13C  
P1 10.00 usec  
PLW1 52.00000000 W

===== CHANNEL f2 =====  
SFO2 400.2116008 MHz  
NUC2 1H  
CPDPRG2 waltz16  
PCPD2 90.00 usec  
PLW2 12.00000000 W  
PLW12 0.35777000 W  
PLW13 0.28979000 W

F2 - Processing parameters  
SI 32768  
SF 100.6328850 MHz  
WDW EM  
SSB 0  
LB 1.00 Hz  
GB 0  
PC 1.40



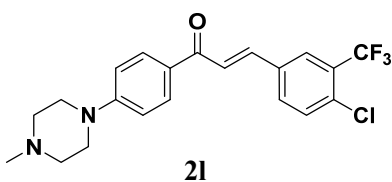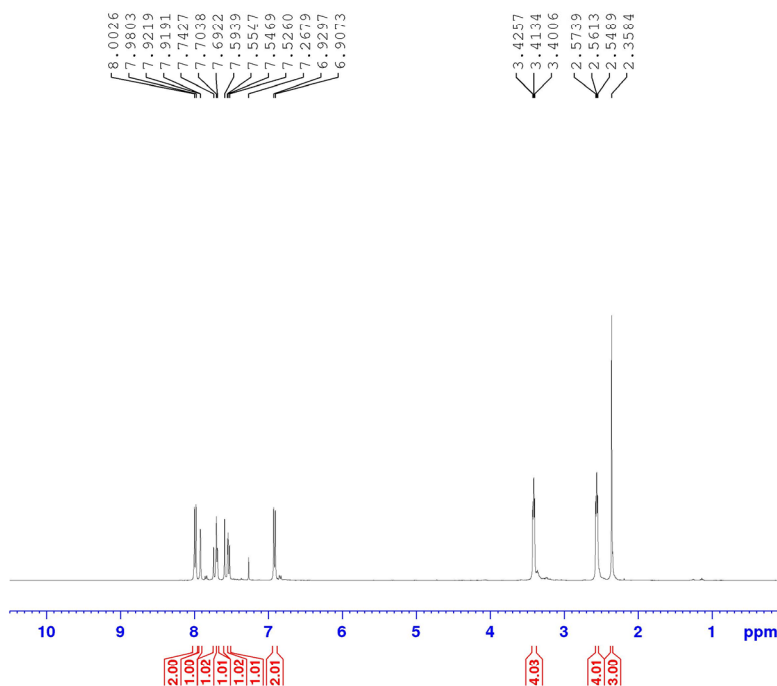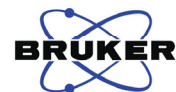

Current Data Parameters  
NAME AKA-VIII-28  
EXPNO 1  
PROCNO 1

F2 - Acquisition Parameters  
Date\_ 20210209  
Time 15.29  
INSTRUM spect  
PROBHD 5 mm PABBO BB/  
PULPROG zg30  
TD 65536  
SOLVENT CDCl3  
NS 16  
DS 2  
SWH 8012.520 Hz  
FIDRES 0.122266 Hz  
AQ 4.0894463 sec  
RG 103.95  
DW 62.400 usec  
DE 6.50 usec  
TE 297.6 K  
D1 1.00000000 sec  
TD0 1

===== CHANNEL f1 =====  
SFO1 400.2124715 MHz  
NUC1 1H  
P1 15.54 usec  
PLW1 12.00000000 W

F2 - Processing parameters  
SI 32768  
SF 400.2100098 MHz  
WDW EM  
SSB 0  
LB 0.30 Hz  
GB 0  
PC 1.00

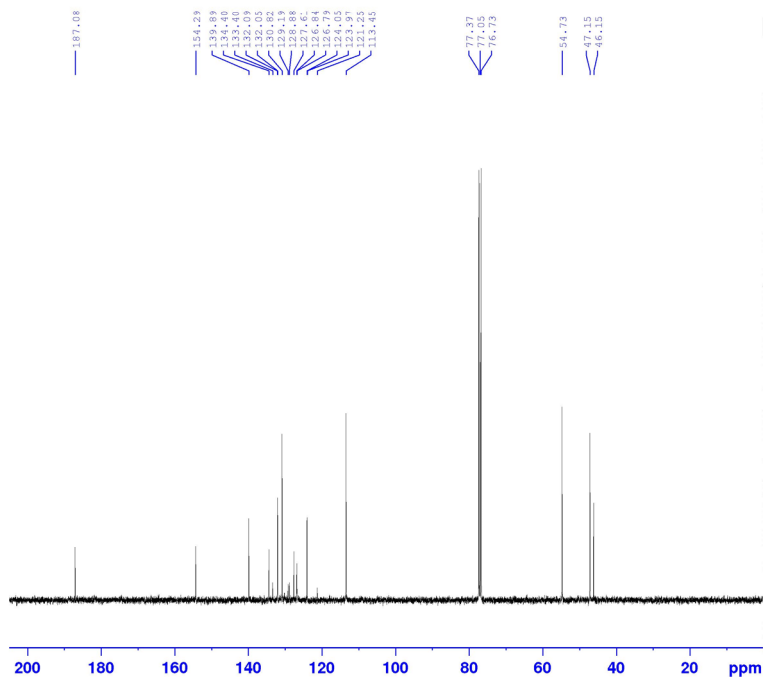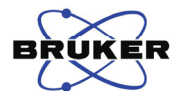

Current Data Parameters  
NAME AKA-VIII-28  
EXPNO 2  
PROCNO 1

F2 - Acquisition Parameters  
Date\_ 20210209  
Time 15.42  
INSTRUM spect  
PROBHD 5 mm PABBO BB/  
PULPROG zgpg30  
TD 65536  
SOLVENT CDCl3  
NS 200  
DS 4  
SWH 24038.461 Hz  
FIDRES 0.366798 Hz  
AQ 1.3631488 sec  
RG 190.62  
DW 20.800 usec  
DE 6.50 usec  
TE 298.4 K  
D1 2.00000000 sec  
D11 0.03000000 sec  
TD0 1

===== CHANNEL f1 =====  
SFO1 100.6429474 MHz  
NUC1 13C  
P1 10.00 usec  
PLW1 52.00000000 W

===== CHANNEL f2 =====  
SFO2 400.2116008 MHz  
NUC2 1H  
CPDPRG[2] waltz16  
PCPD2 90.00 usec  
PLW2 12.00000000 W  
PLW12 0.35777000 W  
PLW13 0.28979000 W

F2 - Processing parameters  
SI 32768  
SF 100.6328850 MHz  
WDW EM  
SSB 0  
LB 1.00 Hz  
GB 0  
PC 1.40

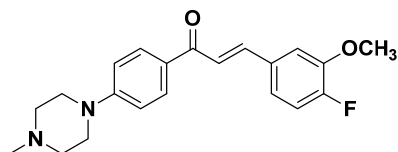

2m

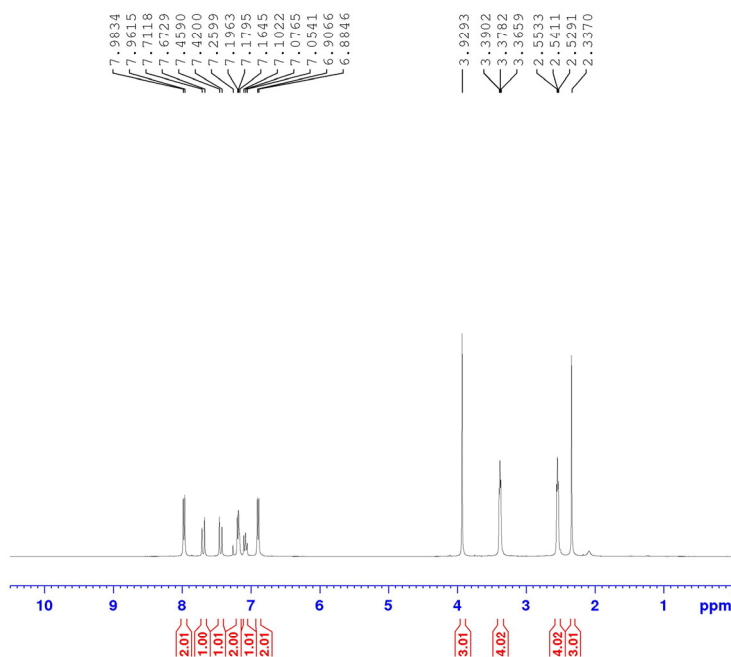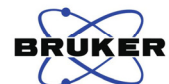

Current Data Parameters  
NAME AK-Vill-30  
EXPNO 1  
PROCNO 1

F2 - Acquisition Parameters  
Date\_ 20220809  
Time 11.52  
INSTRUM spect  
PROBHD 5 mm PABBO BB/  
PULPROG zg30  
TD 65536  
SOLVENT CDCl3  
NS 16  
DS 2  
SWH 8012.820 Hz  
FIDRES 0.122266 Hz  
AQ 4.0894465 sec  
RG 76.56  
DW 62.400 usec  
DE 6.50 usec  
TE 300.0 K  
D1 1.00000000 sec  
TDO 1

===== CHANNEL f1 =====  
SFO1 400.2124715 MHz  
NUC1 1H  
P1 16.00 usec  
PLW1 13.00000000 W

F2 - Processing parameters  
SI 65536  
SF 400.2100131 MHz  
WDW EM  
SSB 0  
LB 0.30 Hz  
GB 0  
PC 1.00

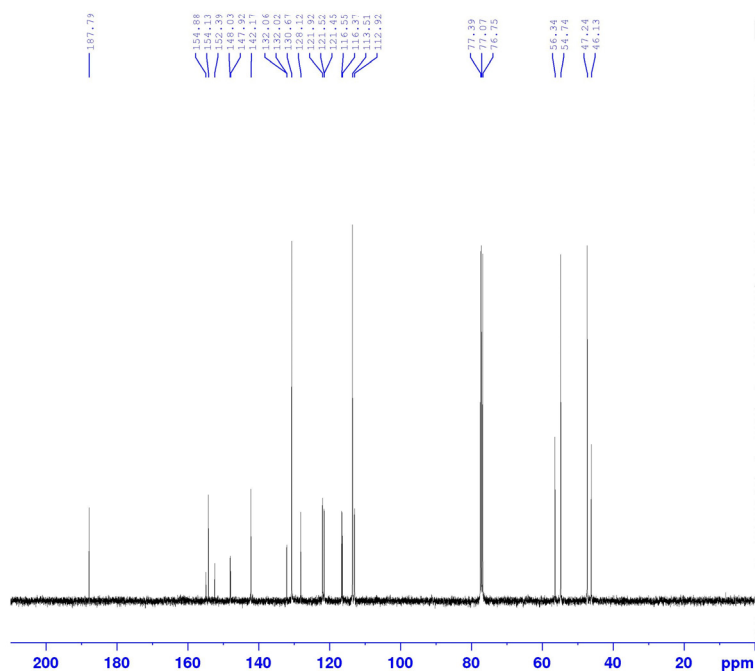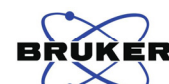

Current Data Parameters  
NAME AK-Vill-30  
EXPNO 2  
PROCNO 1

F2 - Acquisition Parameters  
Date\_ 20220809  
Time 11.55  
INSTRUM spect  
PROBHD 5 mm PABBO BB/  
PULPROG zgpg30  
TD 65536  
SOLVENT CDCl3  
NS 300  
DS 4  
SWH 24038.461 Hz  
FIDRES 0.366798 Hz  
AQ 1.3631488 sec  
RG 190.62  
DW 20.800 usec  
DE 6.50 usec  
TE 300.6 K  
D1 2.00000000 sec  
D11 0.03000000 sec  
TDO 1

===== CHANNEL f1 =====  
SFO1 100.6429474 MHz  
NUC1 13C  
P1 10.00 usec  
PLW1 65.00000000 W

===== CHANNEL f2 =====  
SFO2 400.2116008 MHz  
NUC2 1H  
CPDPRG2 waltz16  
PCPD2 90.00 usec  
PLW2 13.00000000 W  
PLW12 0.36111000 W  
PLW13 0.29249999 W

F2 - Processing parameters  
SI 32768  
SF 100.6328850 MHz  
WDW EM  
SSB 0  
LB 1.00 Hz  
GB 0  
PC 1.40

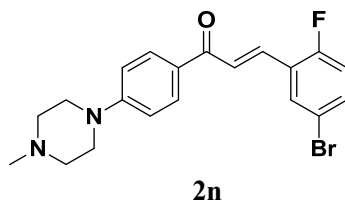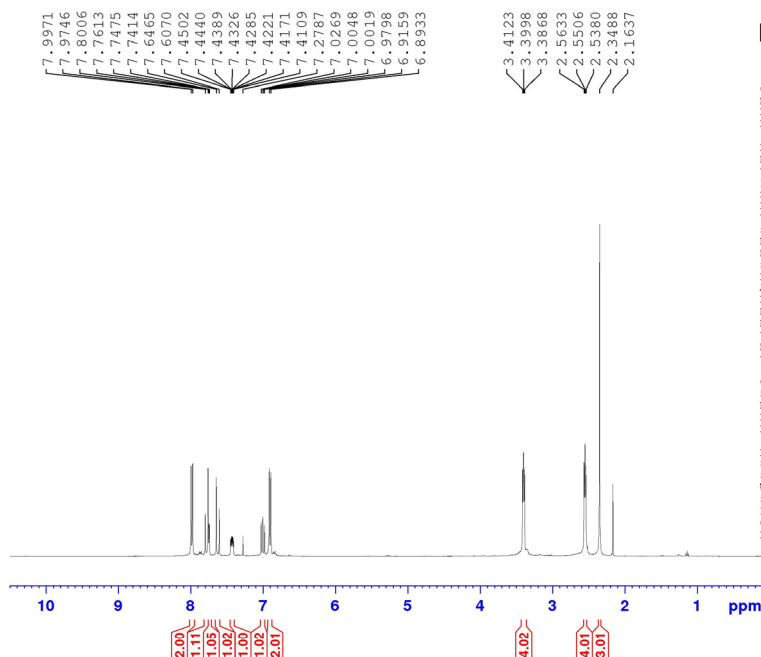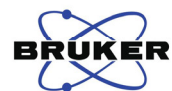

Current Data Parameters  
NAME AKA-VIII-94  
EXPNO 1  
PROCNO 1

F2 - Acquisition Parameters  
Date\_ 20211020  
Time 19:41  
INSTRUM spect  
PROBHD 5 mm PABBO BB/  
PULPROG zg30  
TD 65536  
SOLVENT CDCl<sub>3</sub>  
NS 16  
DS 2  
SWH 8012.820 Hz  
FIDRES 0.122266 Hz  
AQ 4.0894465 sec  
RG 38.64  
DW 62.400 usec  
DE 6.50 usec  
TE 295.8 K  
D1 1.00000000 sec  
TD0 1

===== CHANNEL f1 =====  
SFO1 400.2124715 MHz  
NUC1 1H  
P1 16.00 usec  
PLW1 13.00000000 W

F2 - Processing parameters  
SI 65536  
SF 400.2100054 MHz  
WDW EM  
SSB 0  
LB 0.30 Hz  
GB 0  
PC 1.00

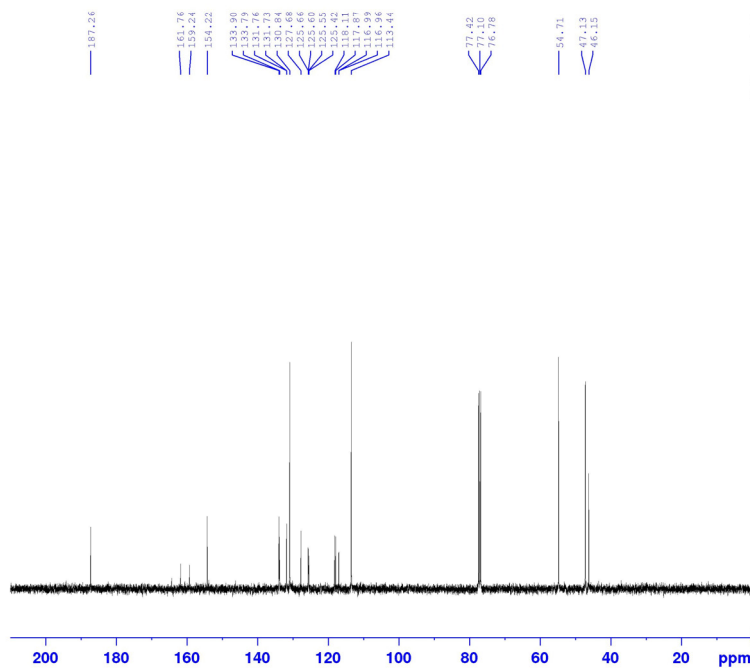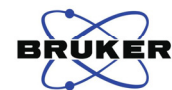

Current Data Parameters  
NAME AKA-VIII-94  
EXPNO 2  
PROCNO 1

F2 - Acquisition Parameters  
Date\_ 20211020  
Time 19:45  
INSTRUM spect  
PROBHD 5 mm PABBO BB/  
PULPROG zgpg30  
TD 65536  
SOLVENT CDCl<sub>3</sub>  
NS 40  
DS 4  
SWH 24038.461 Hz  
FIDRES 0.366798 Hz  
AQ 1.3631488 sec  
RG 190.62  
DW 20.800 usec  
DE 6.50 usec  
TE 297.5 K  
D1 2.00000000 sec  
D11 0.03000000 sec  
TD0 1

===== CHANNEL f1 =====  
SFO1 100.6429474 MHz  
NUC1 13C  
P1 10.00 usec  
PLW1 65.00000000 W

===== CHANNEL f2 =====  
SFO2 400.2116008 MHz  
NUC2 1H  
CPDPRG2 waltz16  
PCPD2 30.00 usec  
PLW2 13.00000000 W  
PLW12 0.36111000 W  
PLW13 0.29249999 W

F2 - Processing parameters  
SI 32768  
SF 100.6328850 MHz  
WDW EM  
SSB 0  
LB 1.00 Hz  
GB 0  
PC 1.40

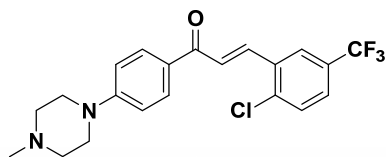

2o

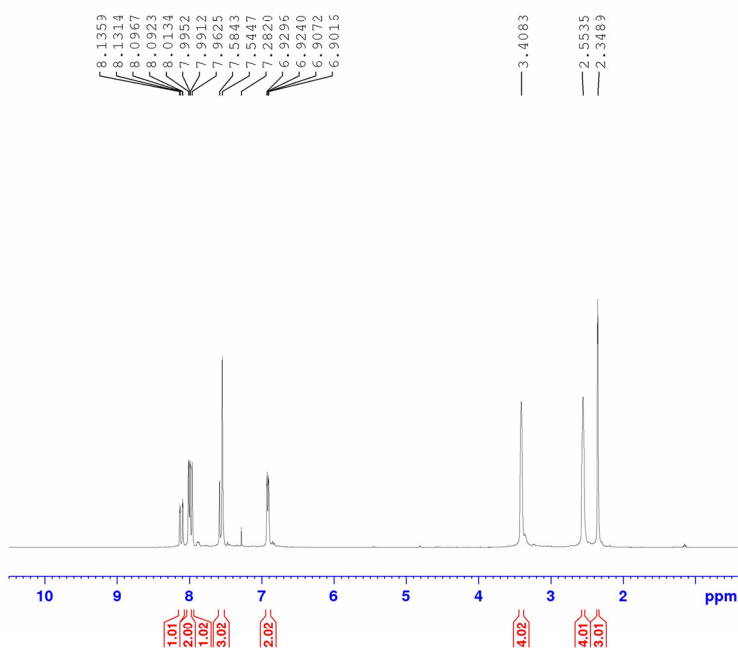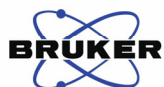

Current Data Parameters  
NAME AKA-IX-1  
EXPNO 1  
PROCNO 1

F2 - Acquisition Parameters  
Date\_ 20211020  
Time 19.52  
INSTRUM spect  
PROBHD 5 mm PABBO BB/  
PULPROG zg30  
TD 65536  
SOLVENT CDCl<sub>3</sub>  
NS 16  
DS 2  
SWH 8012.820 Hz  
FIDRES 0.122266 Hz  
AQ 4.0894465 sec  
RG 52.97  
DM 62.400 usec  
DE 6.50 usec  
TE 298.9 K  
D1 1.00000000 sec  
TD0 1

===== CHANNEL f1 =====  
SFO1 400.2124715 MHz  
NUC1 1H  
P1 16.00 usec  
PLW1 13.00000000 W

F2 - Processing parameters  
SI 65536  
SF 400.2100041 MHz  
WDW EM  
SSB 0  
LB 0.30 Hz  
GB 0  
PC 1.00

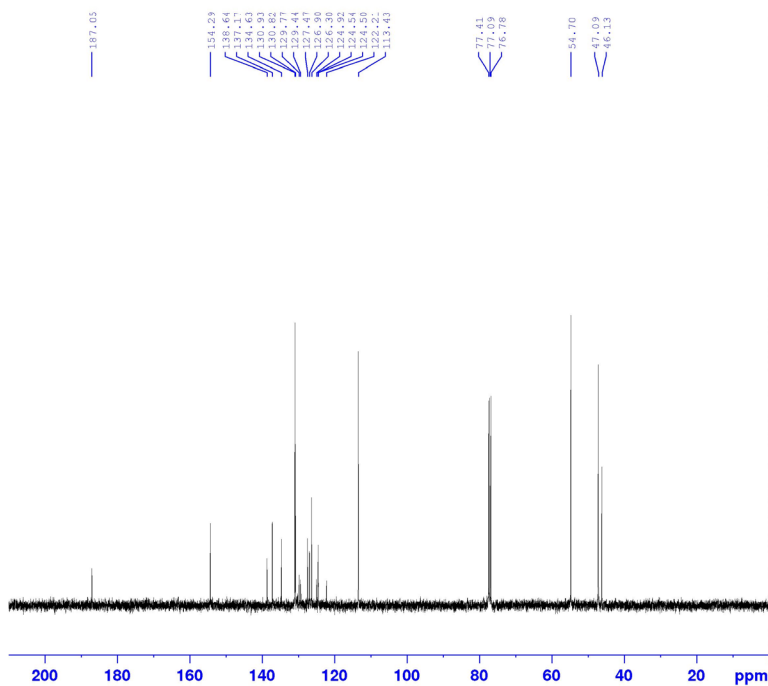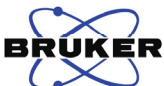

Current Data Parameters  
NAME AKA-IX-1  
EXPNO 2  
PROCNO 1

F2 - Acquisition Parameters  
Date\_ 20211020  
Time 19.56  
INSTRUM spect  
PROBHD 5 mm PABBO BB/  
PULPROG zgpg30  
TD 65536  
SOLVENT CDCl<sub>3</sub>  
NS 40  
DS 4  
SWH 24038.461 Hz  
FIDRES 0.366798 Hz  
AQ 1.3631488 sec  
RG 190.62  
DM 20.800 usec  
DE 6.50 usec  
TE 297.6 K  
D1 2.00000000 sec  
D11 0.03000000 sec  
TD0 1

===== CHANNEL f1 =====  
SFO1 100.6429474 MHz  
NUC1 13C  
P1 10.00 usec  
PLW1 65.00000000 W

===== CHANNEL f2 =====  
SFO2 400.2116008 MHz  
NUC2 1H  
CPDPRG2 waltz16  
PCPD2 90.00 usec  
PLW2 13.00000000 W  
PLW12 0.36111000 W  
PLW13 0.29249999 W

F2 - Processing parameters  
SI 32768  
SF 100.6328850 MHz  
WDW EM  
SSB 0  
LB 1.00 Hz  
GB 0  
PC 1.40

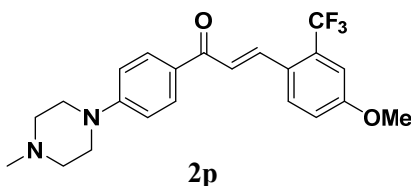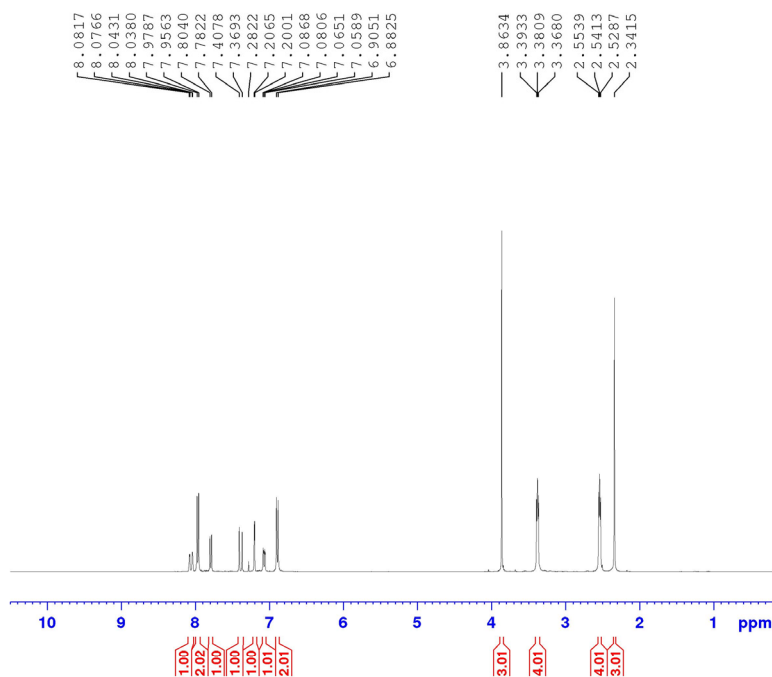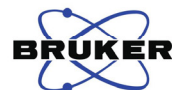

Current Data Parameters  
NAME AKA-IX-3  
EXPNO 1  
PROCNO 1

F2 - Acquisition Parameters  
Date\_ 20211021  
Time 13.01  
INSTRUM spect  
PROBHD 5 mm PABBO sb/  
PULPROG zg30  
TD 65536  
SOLVENT CDCl3  
NS 16  
DS 2  
SWH 8012.820 Hz  
FIDRES 0.122266 Hz  
AQ 4.0894465 sec  
RG 33.2  
DM 62.400 usec  
DE 6.50 usec  
TE 296.9 K  
D1 1.00000000 sec  
TD0 1

===== CHANNEL f1 =====  
SF01 400.2124715 MHz  
NUC1 1H  
P1 16.00 usec  
PLW1 13.00000000 W

F2 - Processing parameters  
SI 65536  
SF 400.2100040 MHz  
WDW EM  
SSB 0  
LB 0.30 Hz  
GB 0  
PC 1.00

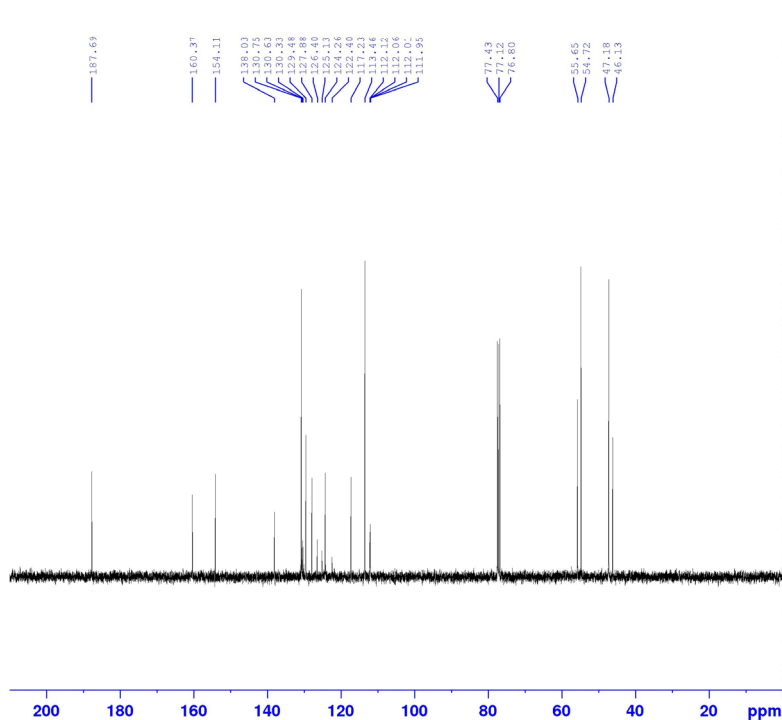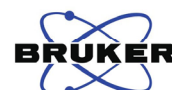

Current Data Parameters  
NAME AKA-IX-3  
EXPNO 2  
PROCNO 1

F2 - Acquisition Parameters  
Date\_ 20211021  
Time 13.03  
INSTRUM spect  
PROBHD 5 mm PABBO sb/  
PULPROG zgpg30  
TD 65536  
SOLVENT CDCl3  
NS 20  
DS 4  
SWH 24038.461 Hz  
FIDRES 0.366798 Hz  
AQ 1.5631488 sec  
RG 190.62  
DM 20.800 usec  
DE 6.50 usec  
TE 297.4 K  
D1 2.00000000 sec  
D11 0.03000000 sec  
TD0 1

===== CHANNEL f1 =====  
SF01 100.6429474 MHz  
NUC1 13C  
P1 10.00 usec  
PLW1 65.00000000 W

===== CHANNEL f2 =====  
SF02 400.2116008 MHz  
NUC2 1H  
CPDPRG2 waltz16  
PCPD2 90.00 usec  
PLW2 13.00000000 W  
PLW12 0.36111000 W  
PLW13 0.29249999 W

F2 - Processing parameters  
SI 32768  
SF 100.6328850 MHz  
WDW EM  
SSB 0  
LB 1.00 Hz  
GB 0  
PC 1.40

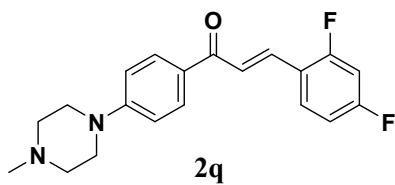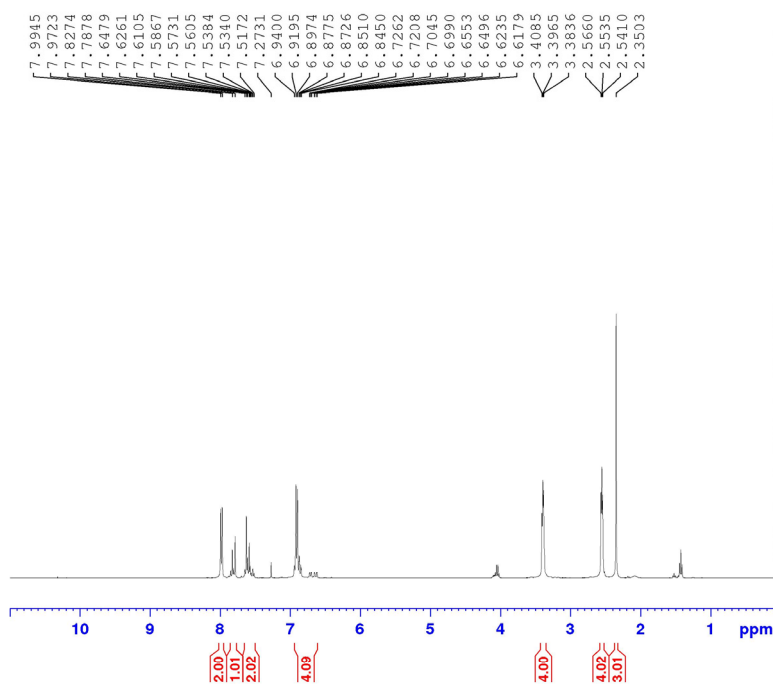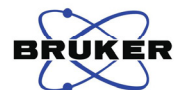

Current Data Parameters  
NAME AKA-IX-17  
EXPNO 1  
PROCNO 1

F2 - Acquisition Parameters  
Date\_ 20211114  
Time 21.46  
INSTRUM spect  
PROBHD 5 mm PABBO ss/  
PULPROG zg30  
TD 65536  
SOLVENT CDCl3  
NS 8  
DS 2  
SWH 8012.820 Hz  
FIDRES 0.122266 Hz  
AQ 4.0894465 sec  
RG 69.69  
DW 62.400 usec  
DE 6.50 usec  
TE 297.7 K  
D1 1.00000000 sec  
TDO 1

===== CHANNEL f1 =====  
SFO1 400.2124715 MHz  
NUC1 1H  
P1 16.00 usec  
PLW1 13.00000000 W

F2 - Processing parameters  
SI 65536  
SF 400.2100076 MHz  
WDW EM  
SSB 0  
LB 0.30 Hz  
GB 0  
PC 1.00

Figure S2. HRMS charts

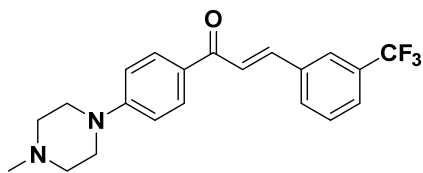

**2a**

$\text{C}_{21}\text{H}_{22}\text{F}_3\text{N}_2\text{O} [\text{M}+\text{H}]^+$ :

Calculated: 375.1684

Found: 375.1701

Mass Spectrum: AKA-IX-4 (Positive mode)

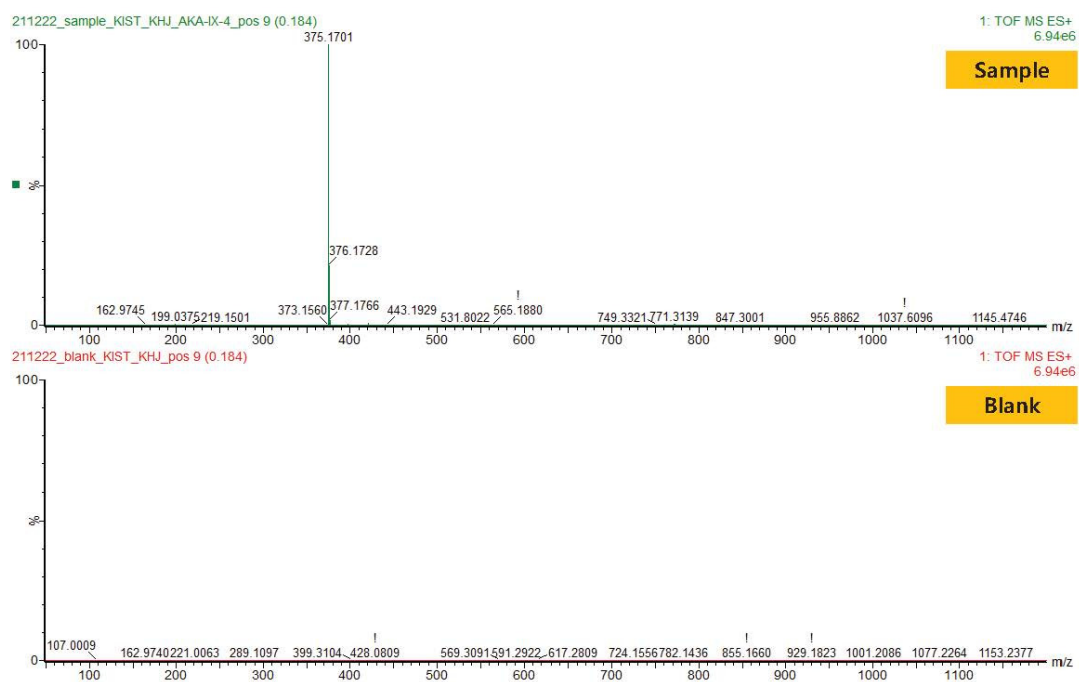

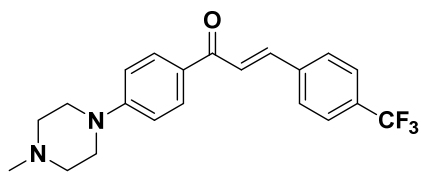

**2b**

$\text{C}_{21}\text{H}_{22}\text{F}_3\text{N}_2\text{O}$   $[\text{M}+\text{H}]^+$ :

Calculated: 375.1684

Found: 375.1693

### Mass Spectrum: AKA-IX-20 (Positive mode)

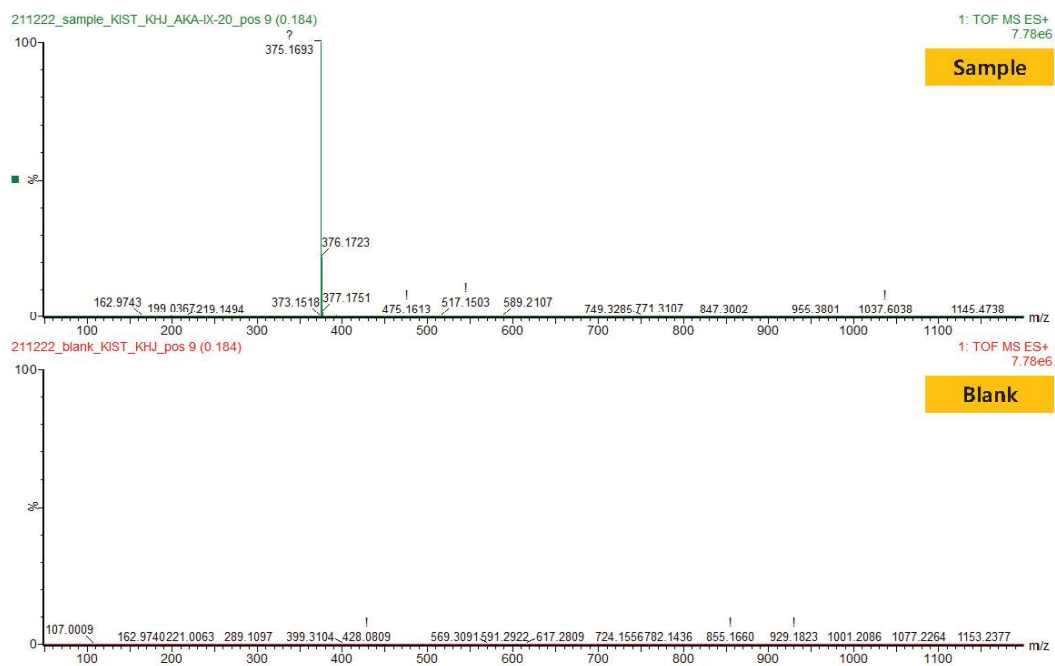



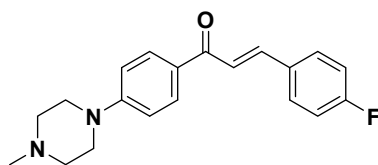

**2c**

$\text{C}_{20}\text{H}_{22}\text{FN}_2\text{O}$   $[\text{M}+\text{H}]^+$ :

Calculated: 325.1716

Found: 325.1722

### Mass Spectrum: AKA-IX-19 (Positive mode)

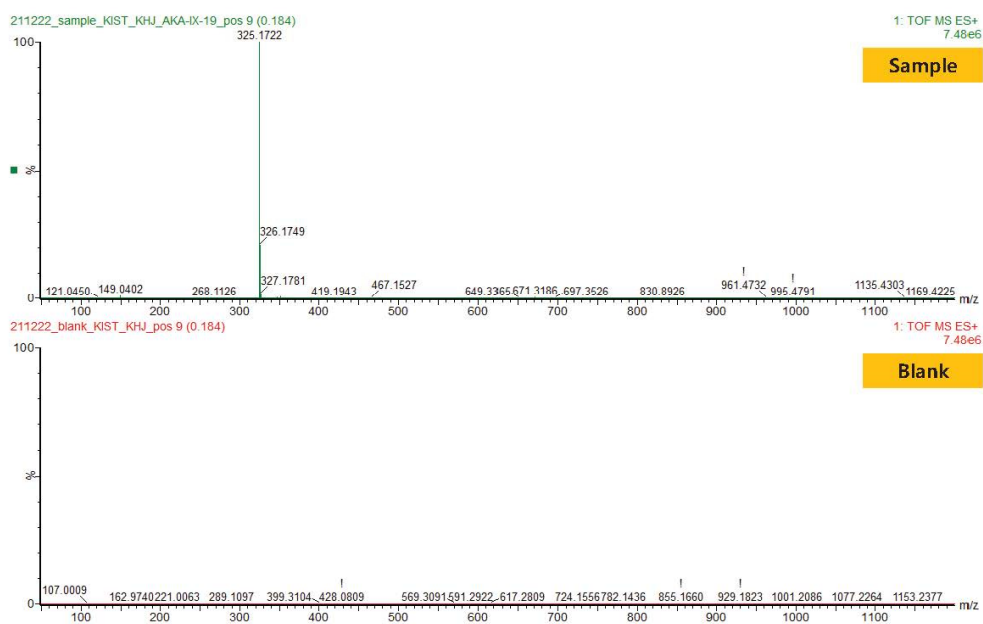

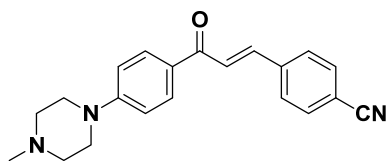

**2d**

$\text{C}_{21}\text{H}_{22}\text{N}_3\text{O}$   $[\text{M}+\text{H}]^+$ :

Calculated: 332.1763

Found: 332.1774

### Mass Spectrum: AK-VIII-91 (Positive mode)

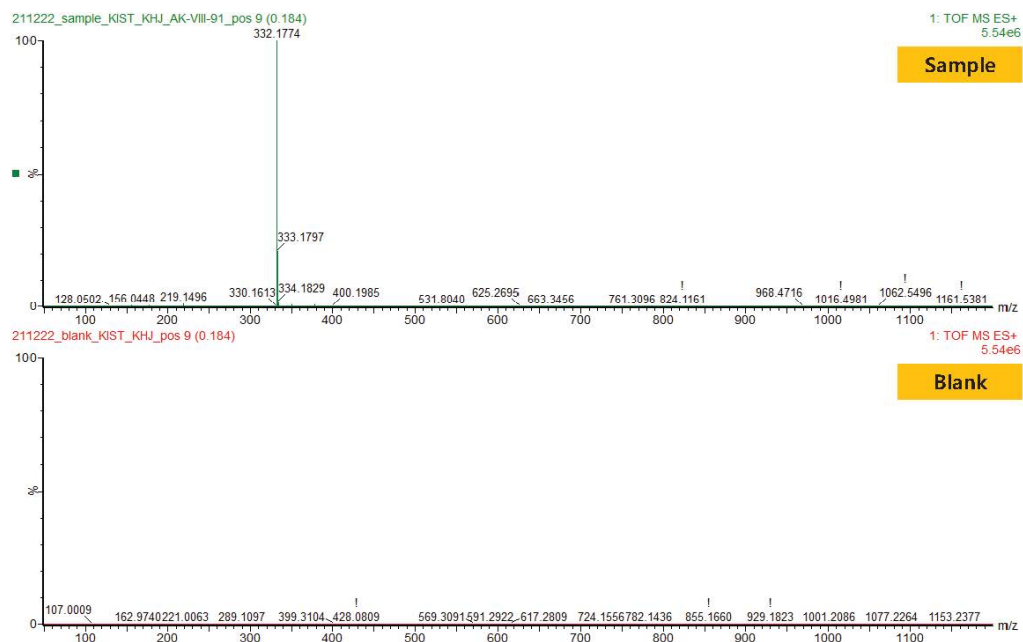

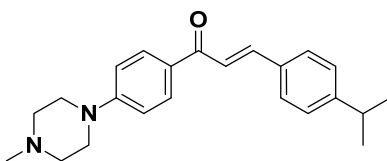

**2e**

$\text{C}_{23}\text{H}_{29}\text{N}_2\text{O}$   $[\text{M}+\text{H}]^+$ :

Calculated: 349.2280

Found: 349.2291

### Mass Spectrum: AK-VIII-92 (Positive mode)

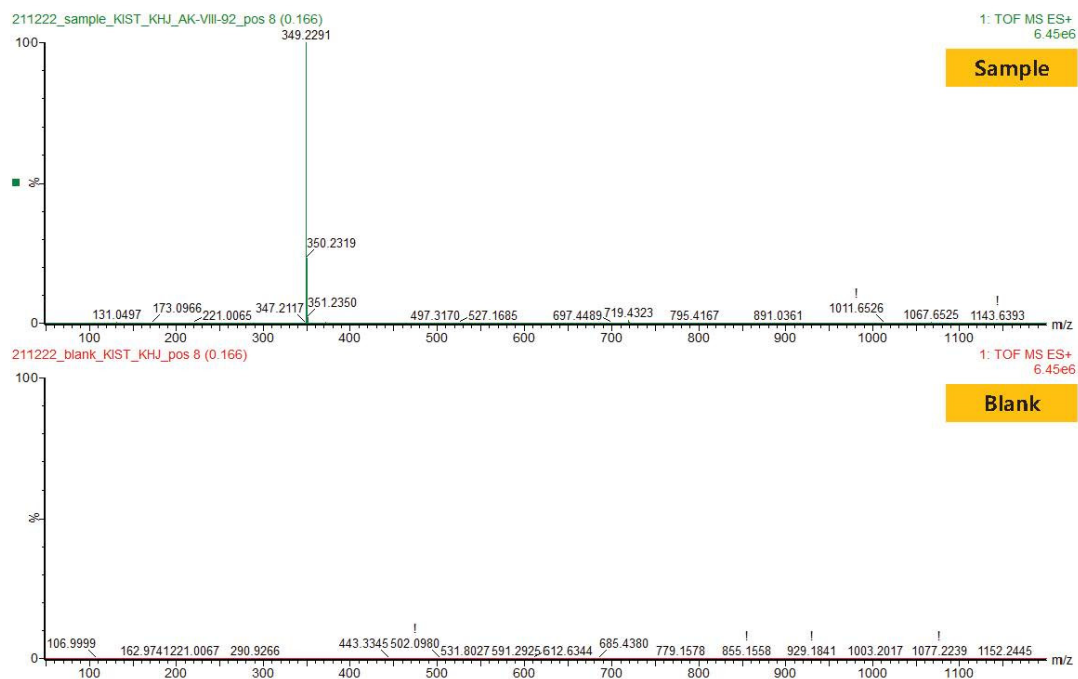

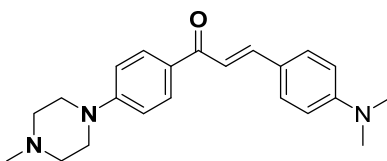

**2f**

$\text{C}_{22}\text{H}_{28}\text{N}_3\text{O}$   $[\text{M}+\text{H}]^+$ :

Calculated: 350.2232

Found: 350.2239

### Mass Spectrum: AK-VIII-100 (Positive mode)

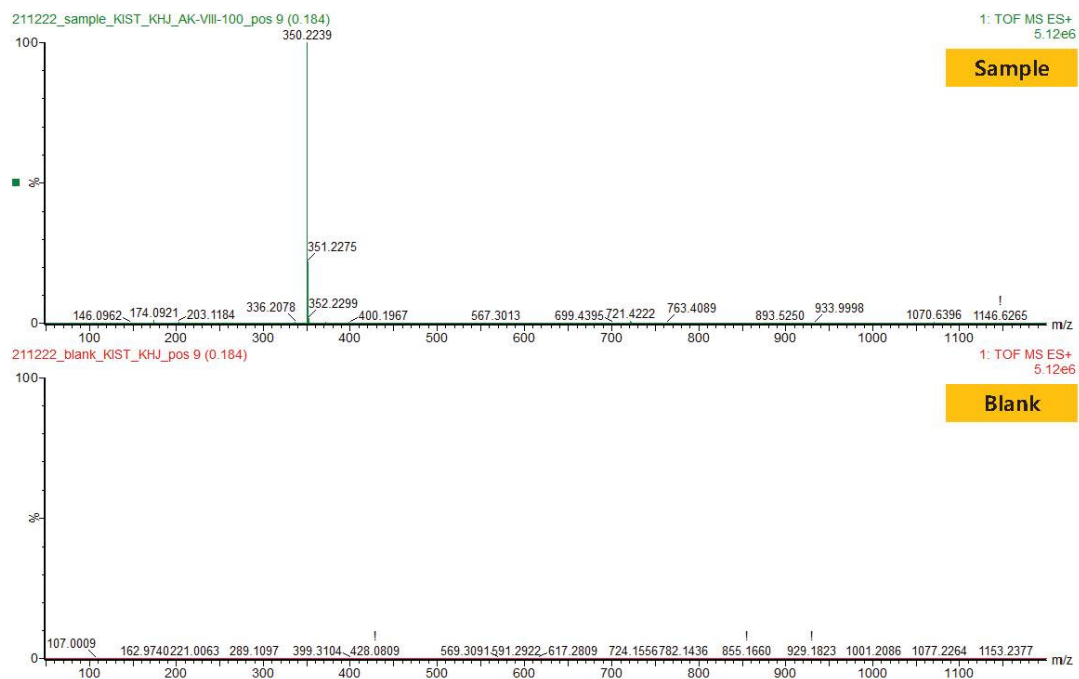

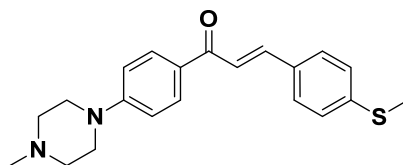

**2g**

$\text{C}_{21}\text{H}_{25}\text{N}_2\text{OS}$   $[\text{M}+\text{H}]^+$ :

Calculated: 353.1688

Found: 353.1694

### Mass Spectrum: AK-VIII-93 (Positive mode)

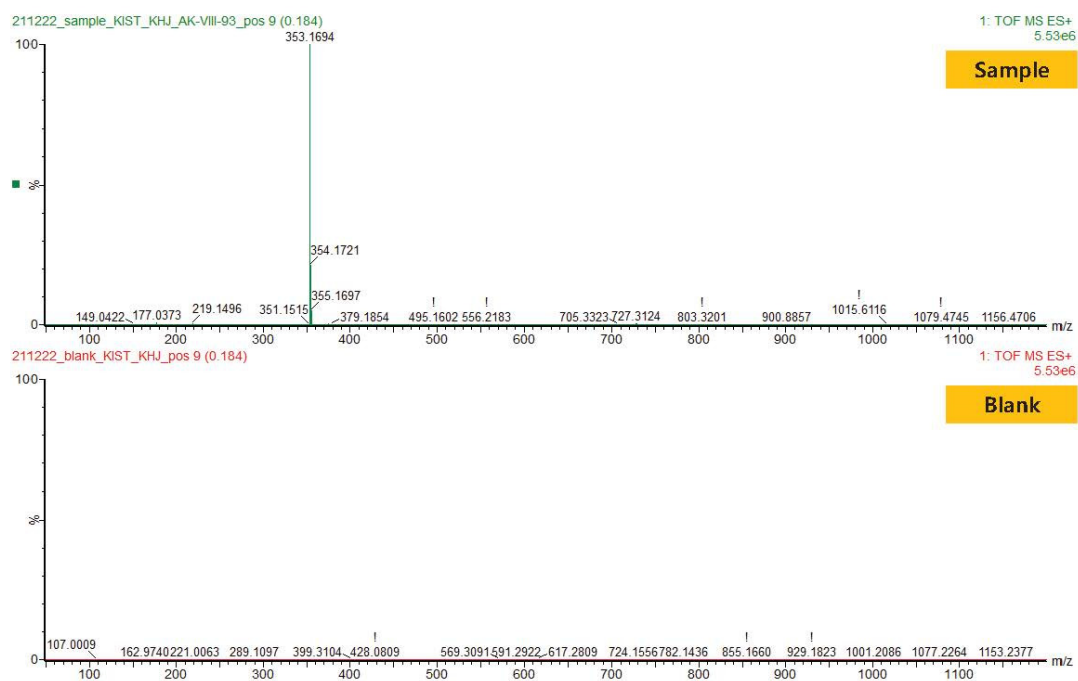

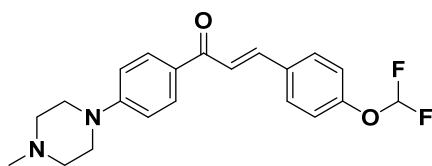

**2h**

$\text{C}_{21}\text{H}_{23}\text{F}_2\text{N}_2\text{O}_2$   $[\text{M}+\text{H}]^+$ :

Calculated: 373.1728

Found: 373.1732

### Mass Spectrum: AKA-IX-2 (Positive mode)

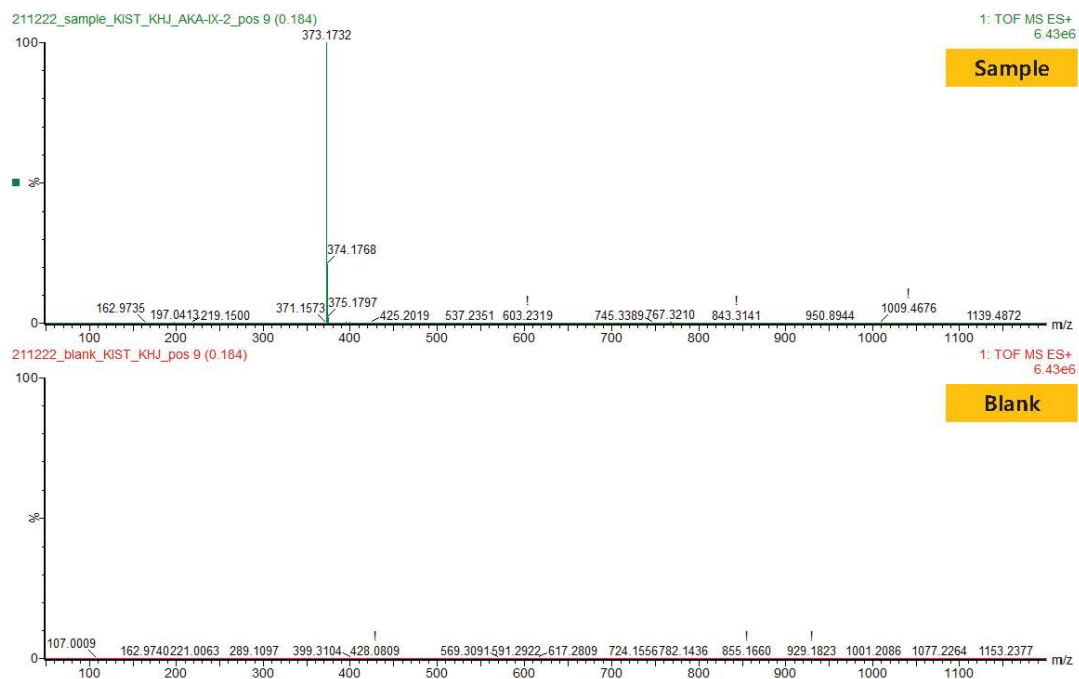

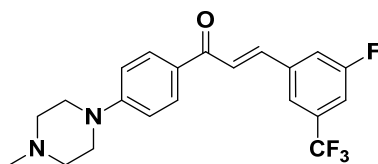

**2i**

$\text{C}_{21}\text{H}_{21}\text{F}_4\text{N}_2\text{O}$   $[\text{M}+\text{H}]^+$ :

Calculated: 393.1590

Found: 393.1592

### Mass Spectrum: AK-VIII-23 (Positive mode)

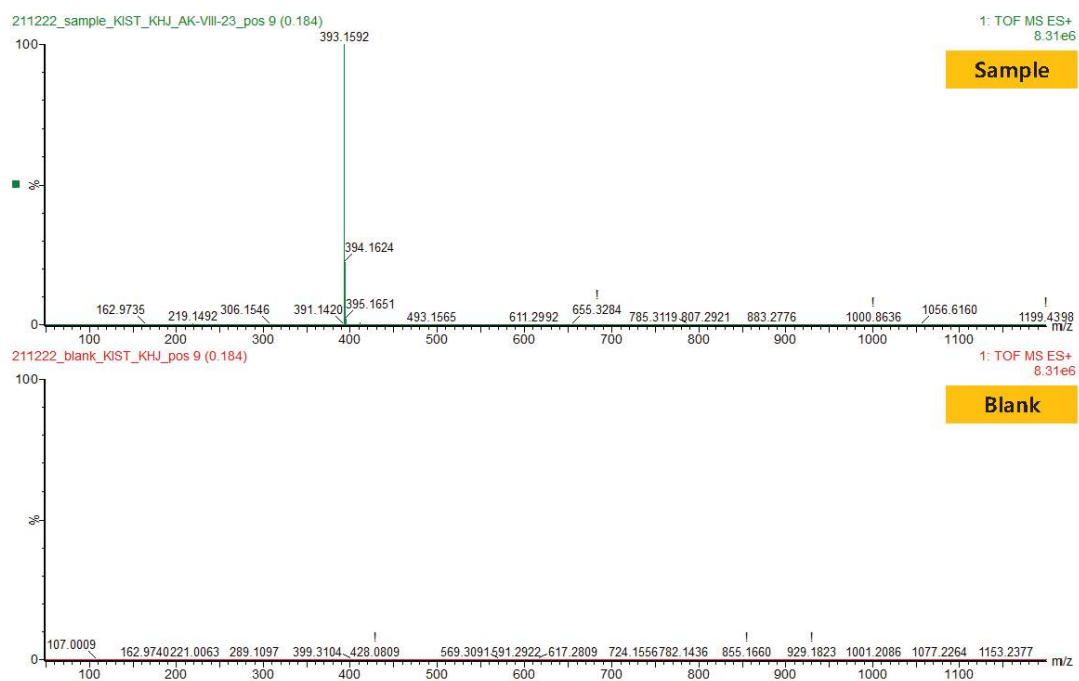

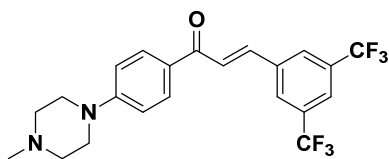

2j

$C_{22}H_{21}F_6N_2O [M+H]^+$

Calculated: 443.1558

Found: 443.1561

### Mass Spectrum: AK-VIII-25 (Positive mode)

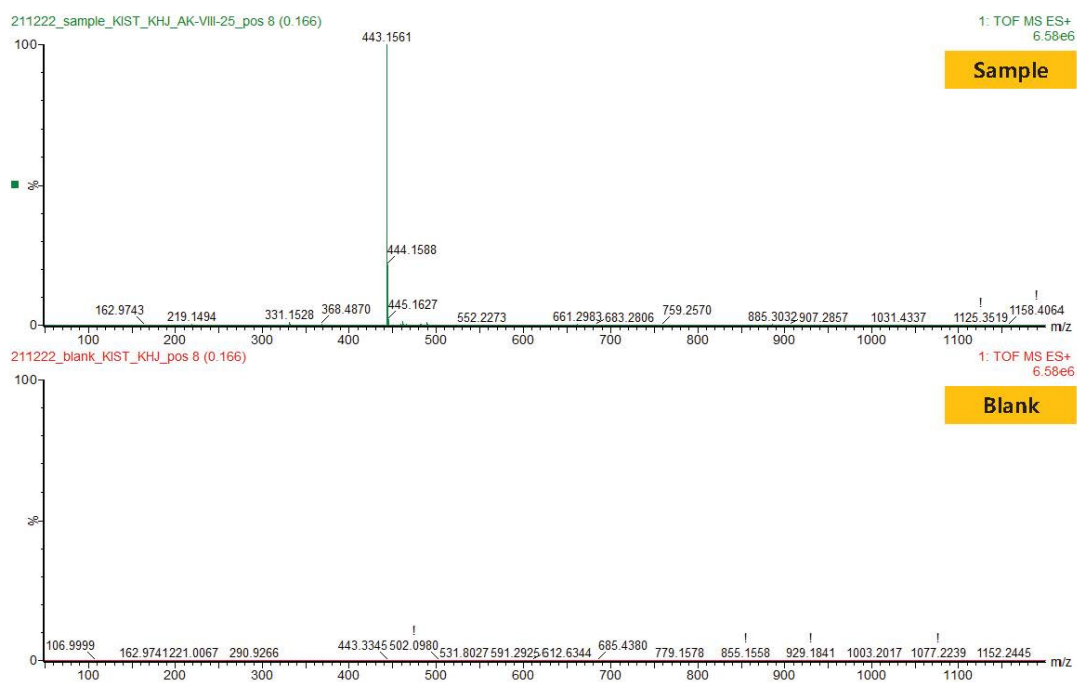



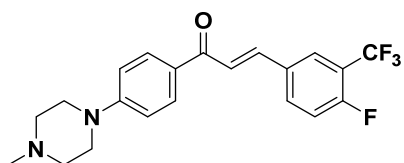

**2k**

$\text{C}_{21}\text{H}_{21}\text{F}_4\text{N}_2\text{O} [\text{M}+\text{H}]^+$

Calculated: 393.1590

Found: 393.1595

### Mass Spectrum: AK-VIII-27 (Positive mode)

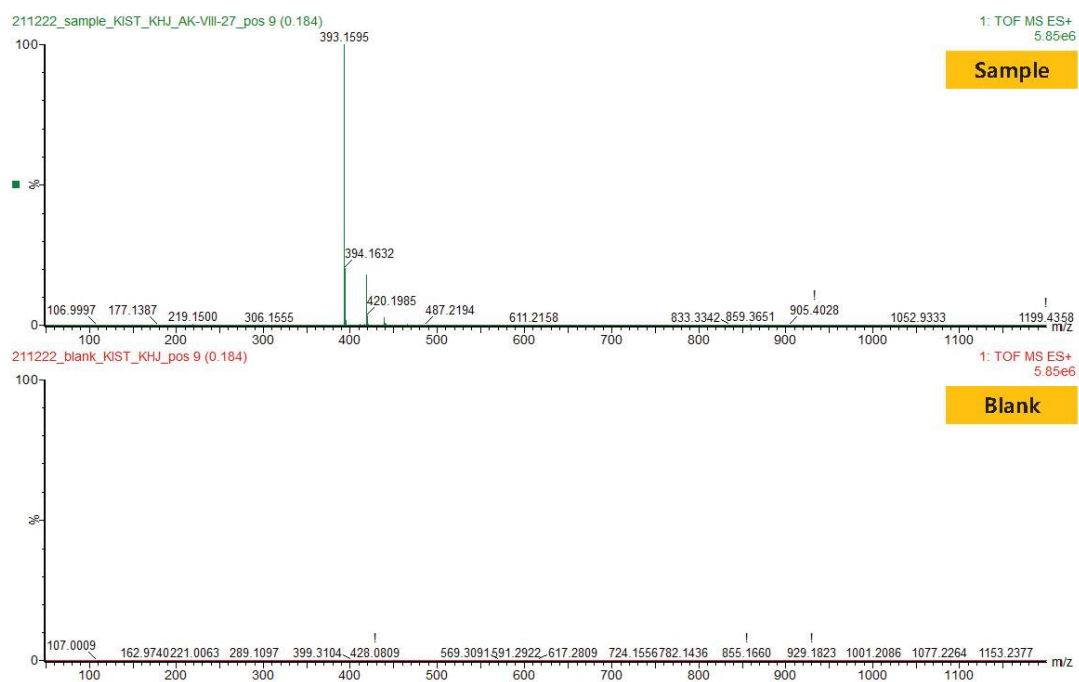

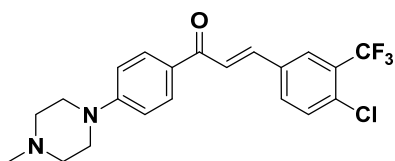

**2I**

$\text{C}_{21}\text{H}_{21}\text{ClF}_3\text{N}_2\text{O}$   $[\text{M}+\text{H}]^+$ :

Calculated: 409.1295

Found: 409.1303

### Mass Spectrum: AK-VIII-28 (Positive mode)

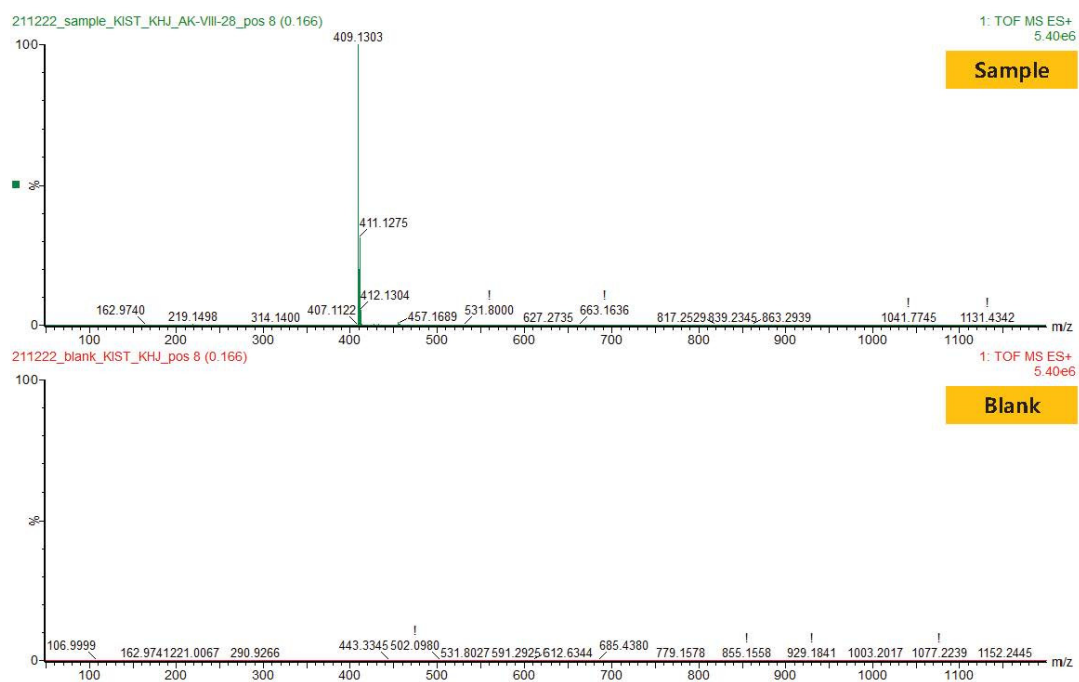

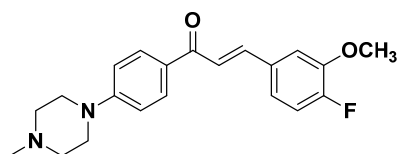

**2m**

$\text{C}_{21}\text{H}_{24}\text{FN}_2\text{O}_2$   $[\text{M}+\text{H}]^+$ :

Calculated: 355.1822

Found: 355.1826

### Mass Spectrum: AK-VIII-30 (Positive mode)

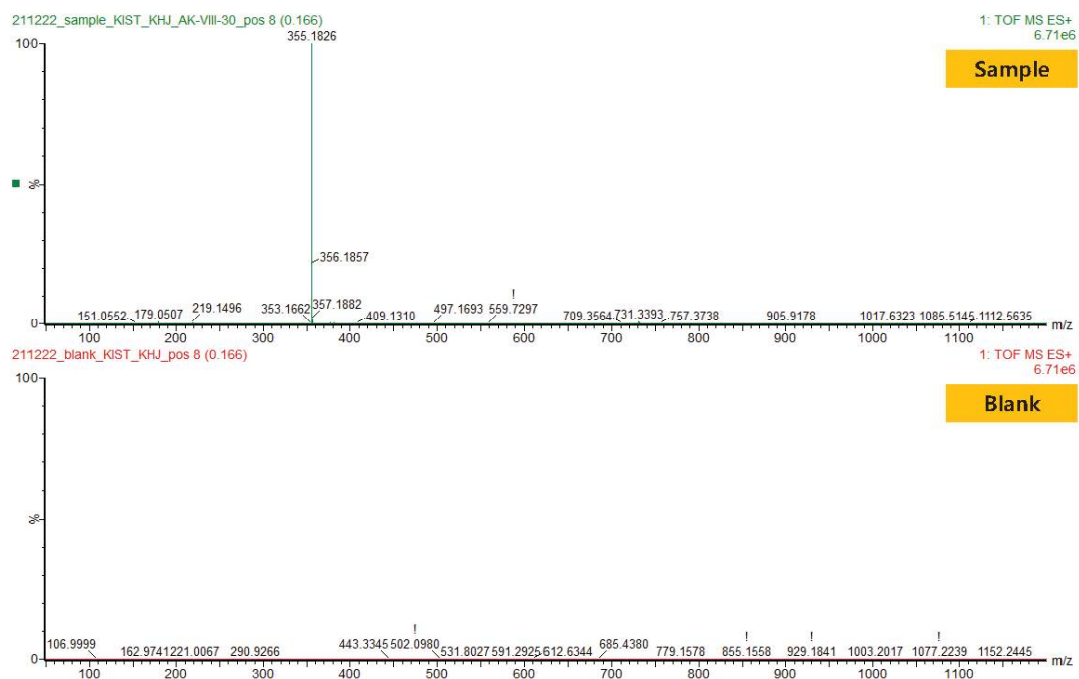

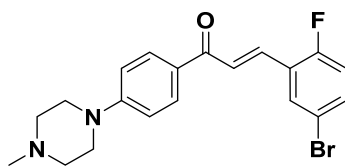

**2n**

$\text{C}_{20}\text{H}_{21}\text{BrFN}_2\text{O}$   $[\text{M}+\text{H}]^+$ :

Calculated: 403.0821

Found: 403.0836

### Mass Spectrum: AK-VIII-94 (Positive mode)

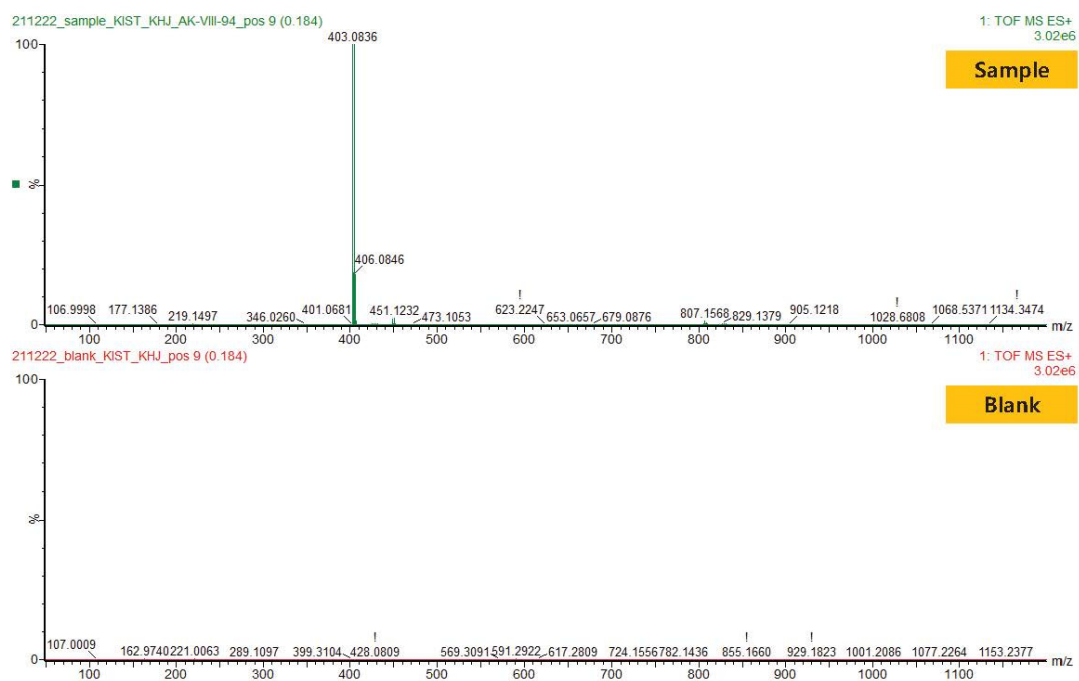

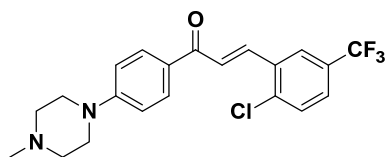

**2o**

$\text{C}_{21}\text{H}_{21}\text{ClF}_3\text{N}_2\text{O}$   $[\text{M}+\text{H}]^+$ :

Calculated: 409.1295

Found: 409.1295

### Mass Spectrum: AKA-IX-1 (Positive mode)

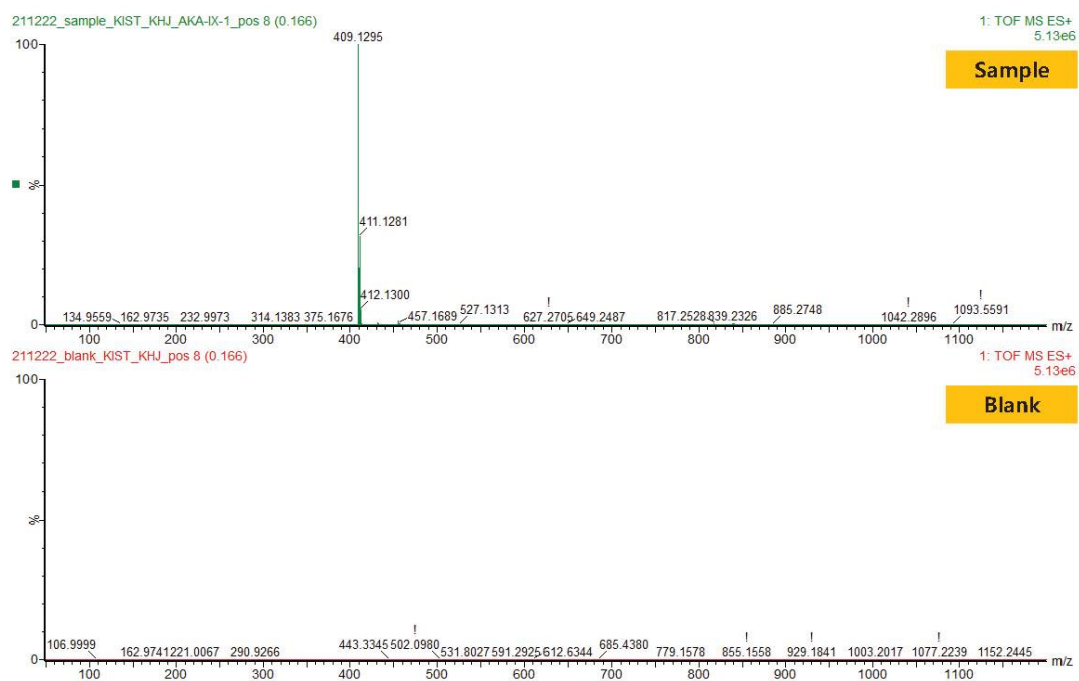

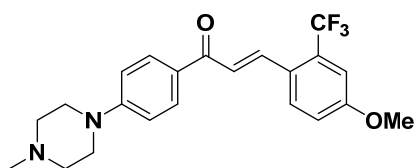

**2p**

$\text{C}_{22}\text{H}_{24}\text{F}_3\text{N}_2\text{O}_2$   $[\text{M}+\text{H}]^+$ :

Calculated: 405.1790

Found: 405.1800

### Mass Spectrum: AKA-IX-3 (Positive mode)

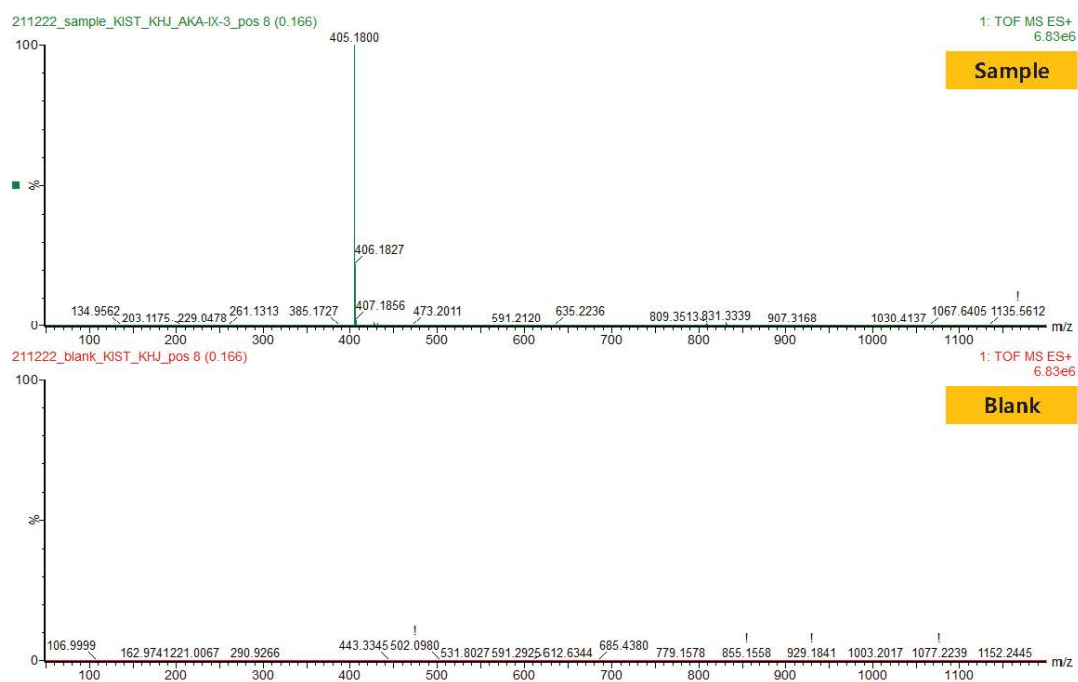

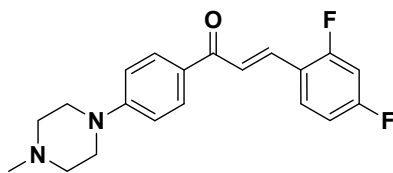

**2q**

$\text{C}_{20}\text{H}_{21}\text{F}_2\text{N}_2\text{O}$   $[\text{M}+\text{H}]^+$ :

Calculated: 343.1622

Found: 343.1622

### Mass Spectrum: AKA-IX-17 (Positive mode)

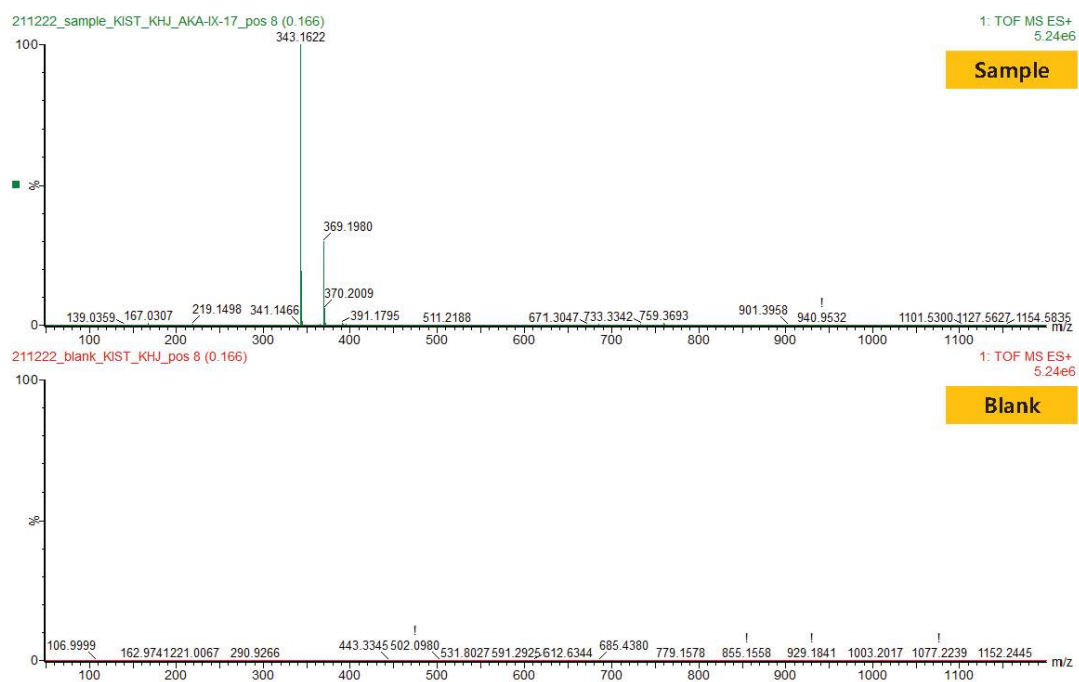

**Figure S3. IR spectra**

**2a**

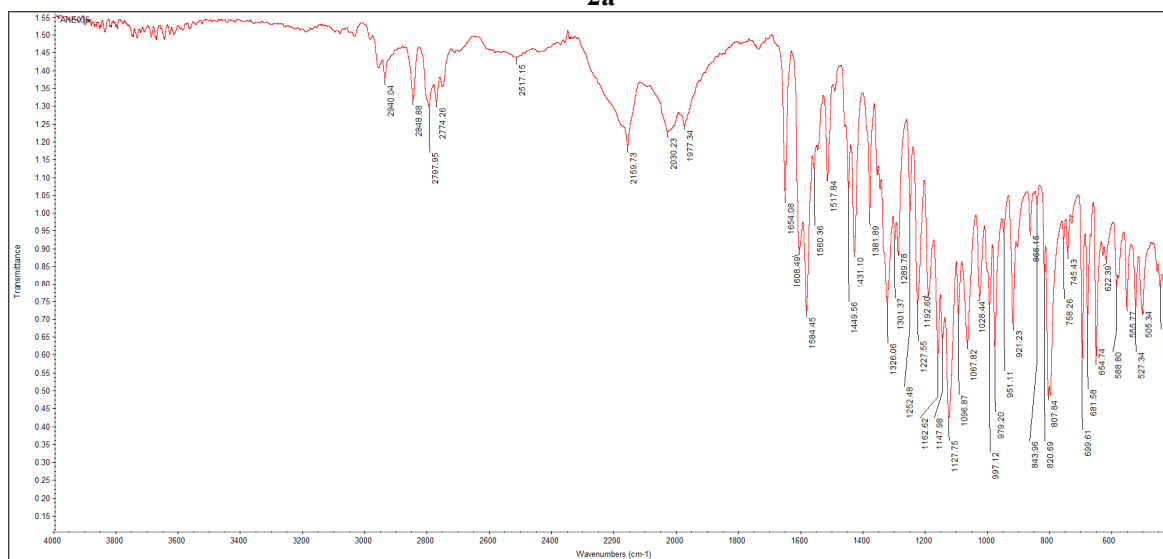

**2b**

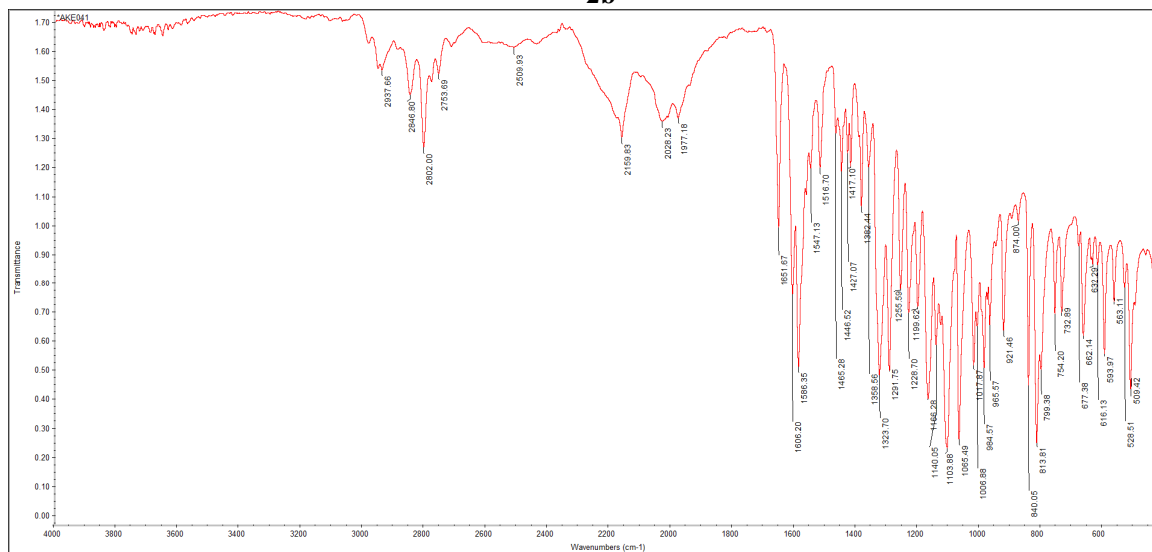



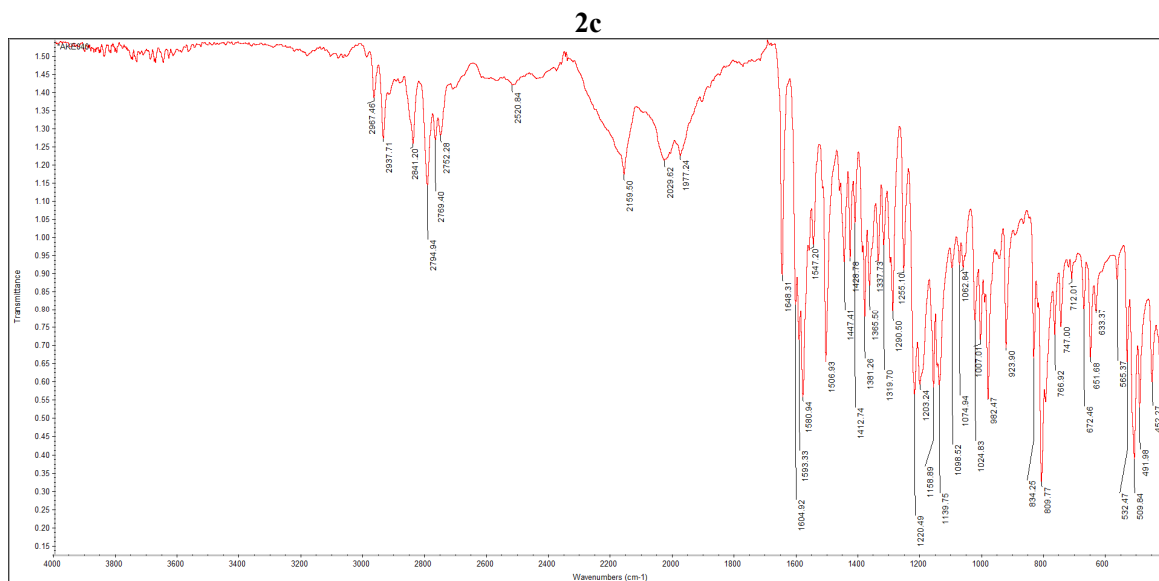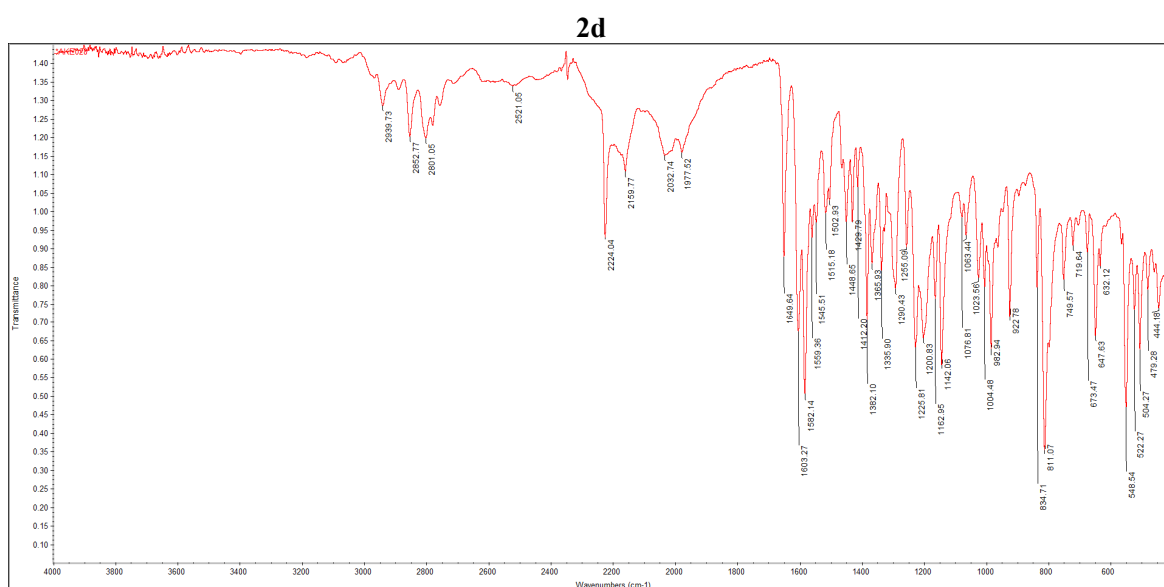

2e

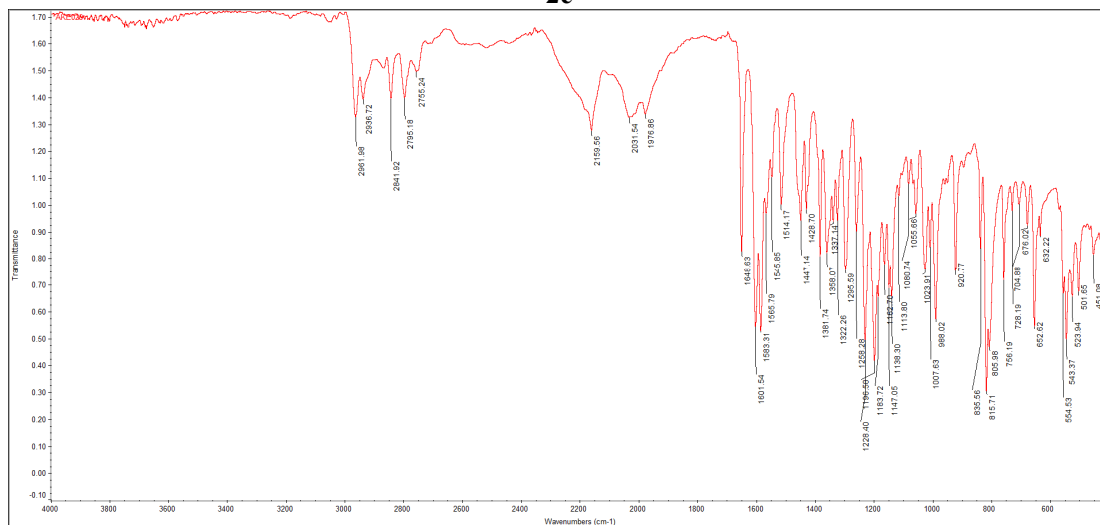

2f

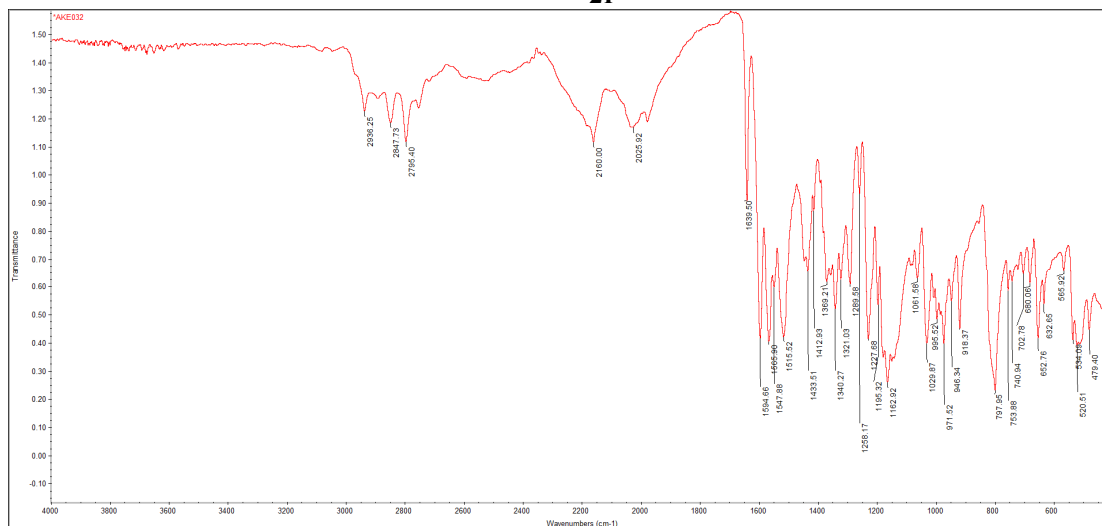

2g

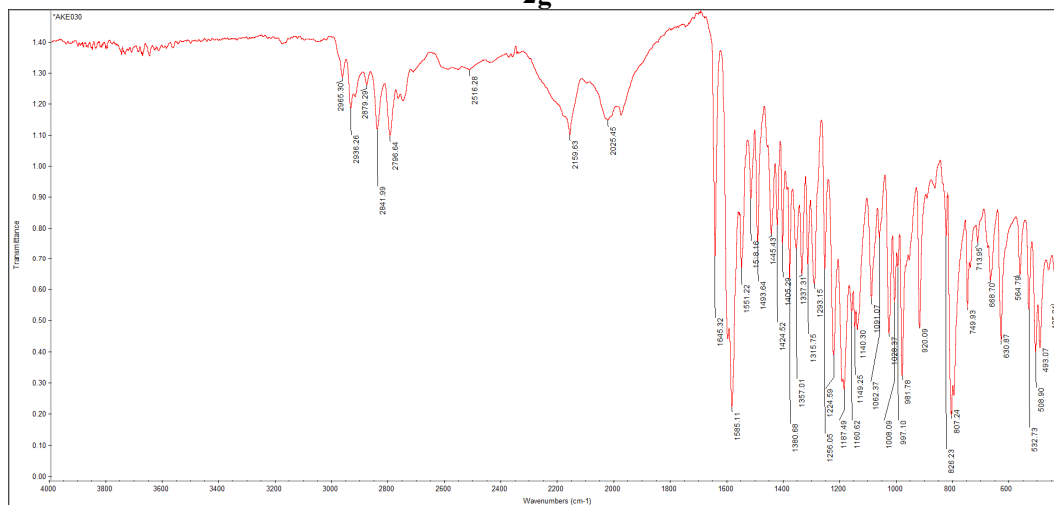

2h

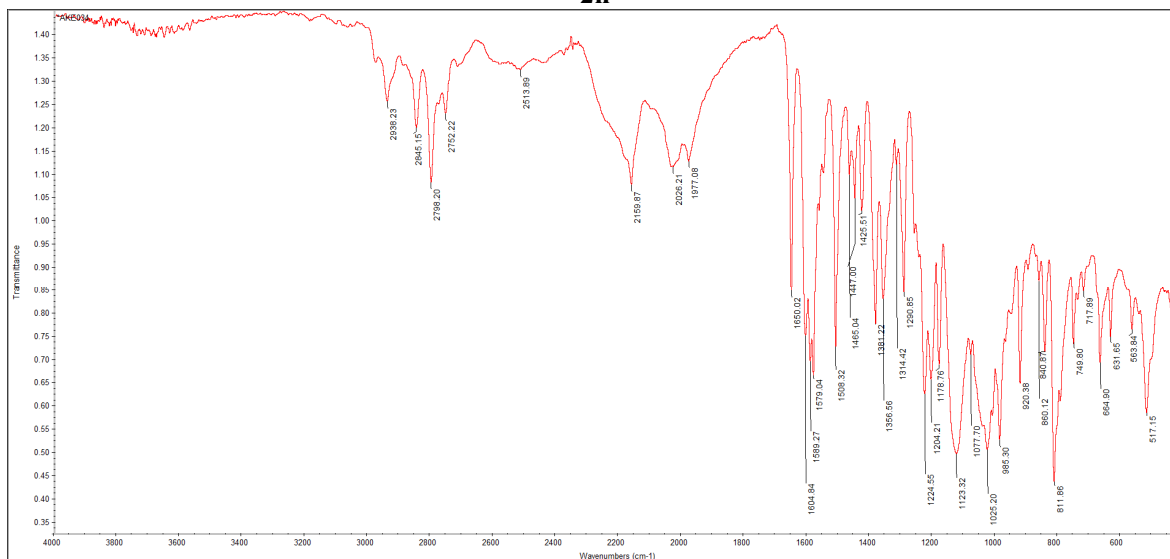

2i

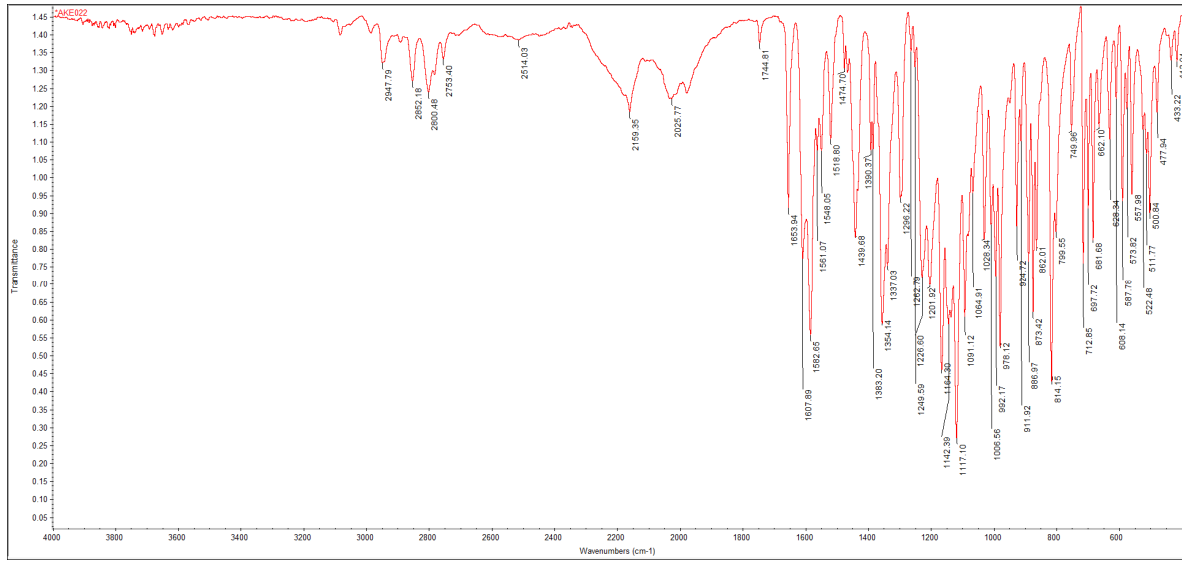

2j

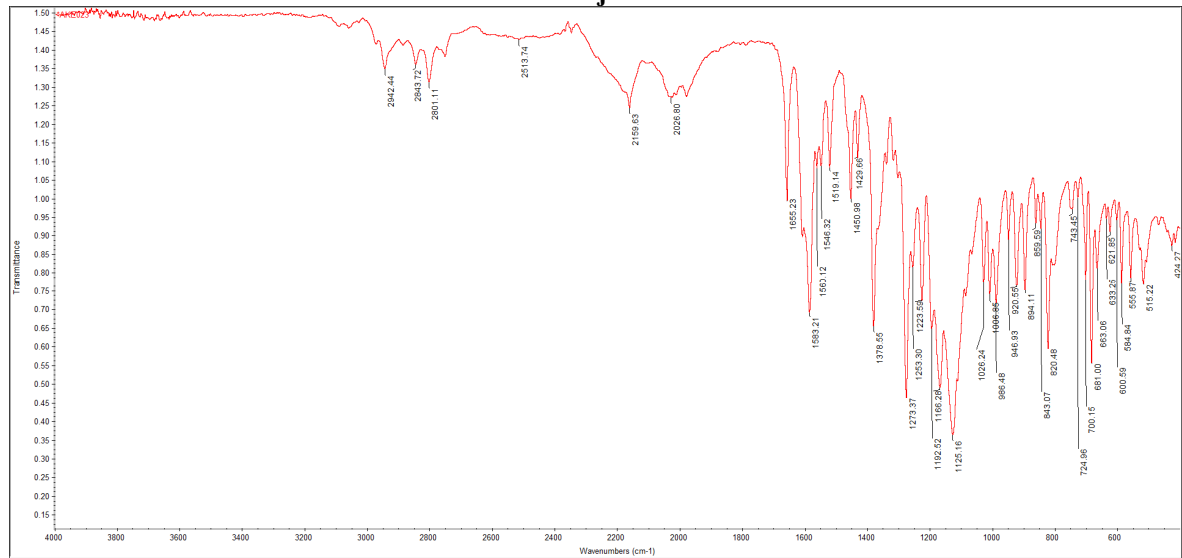

2k

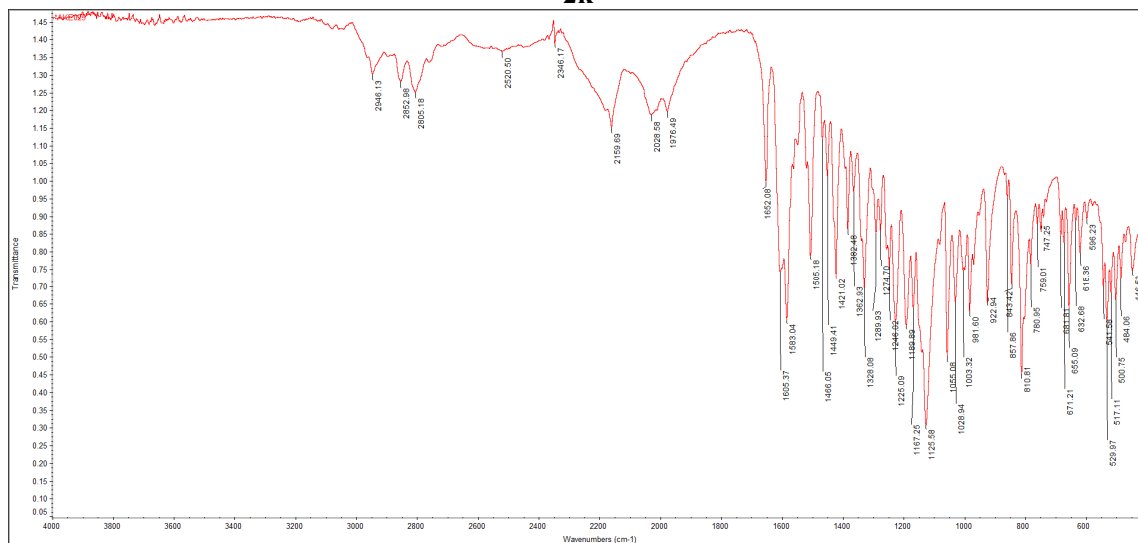

2l

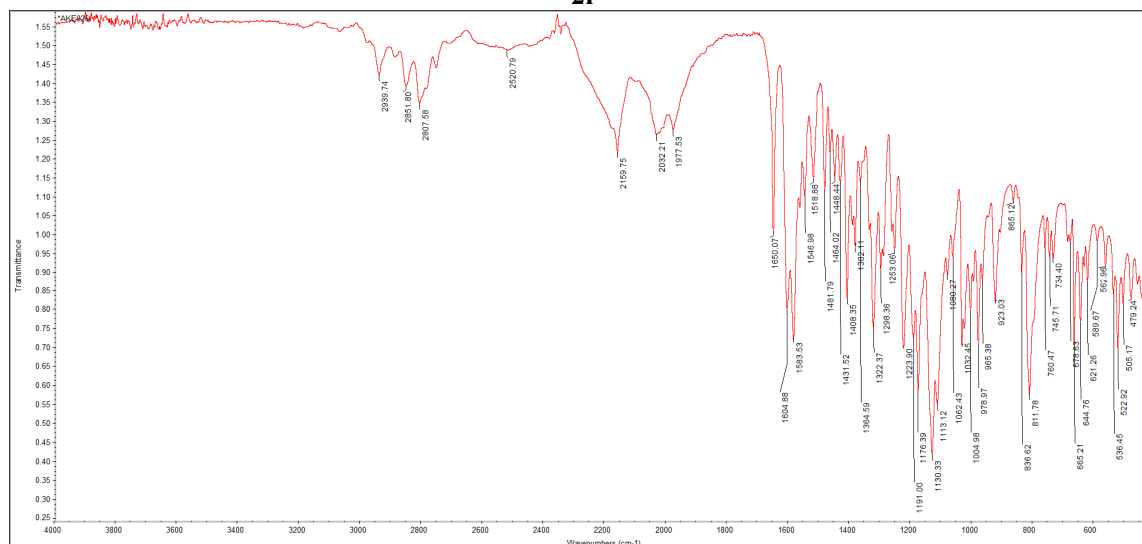

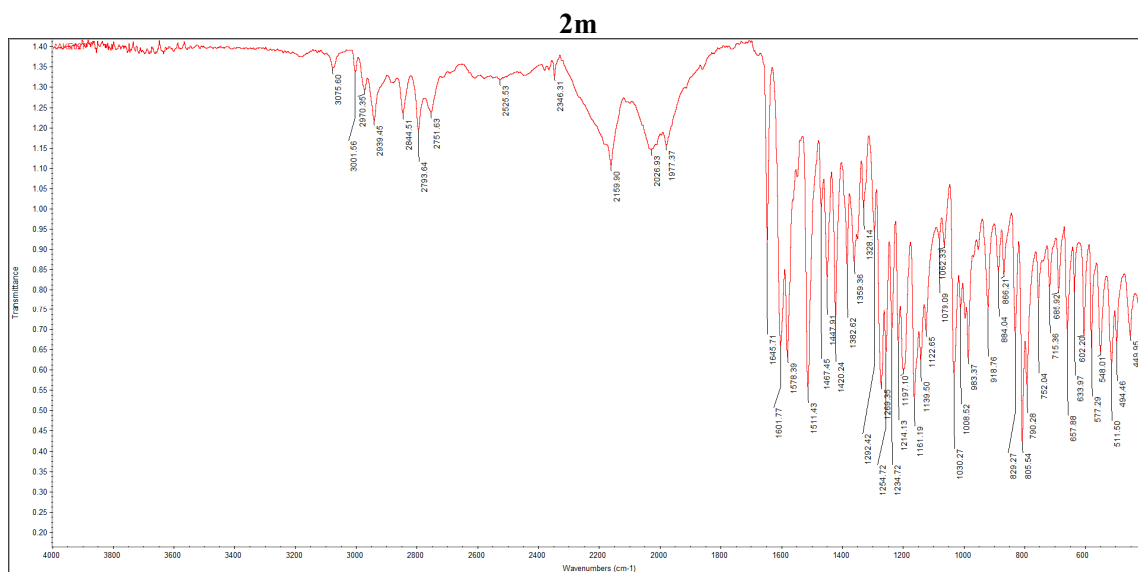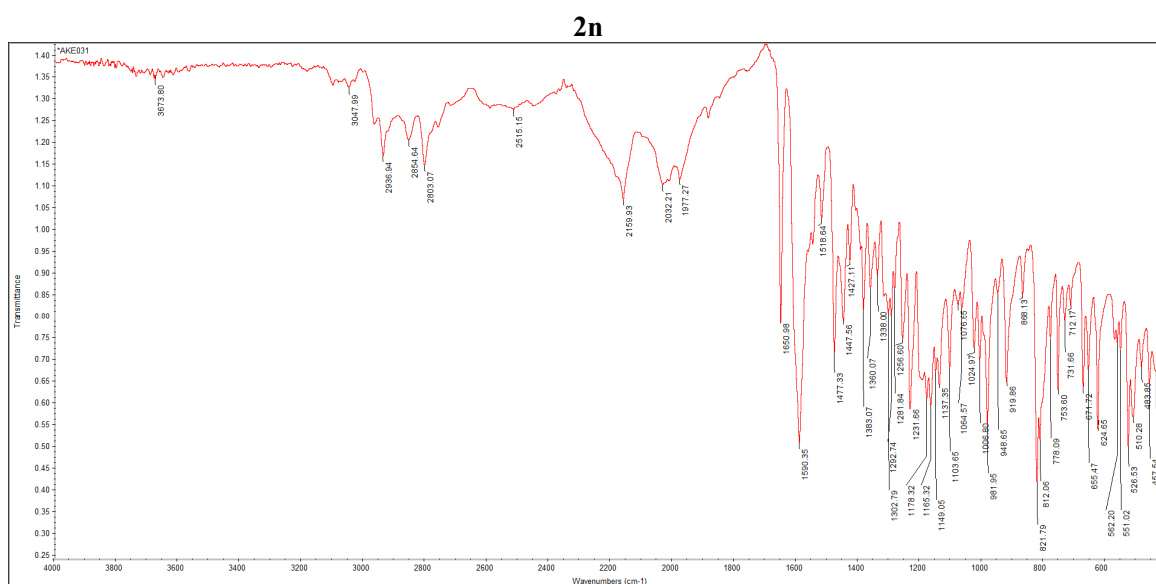

2o

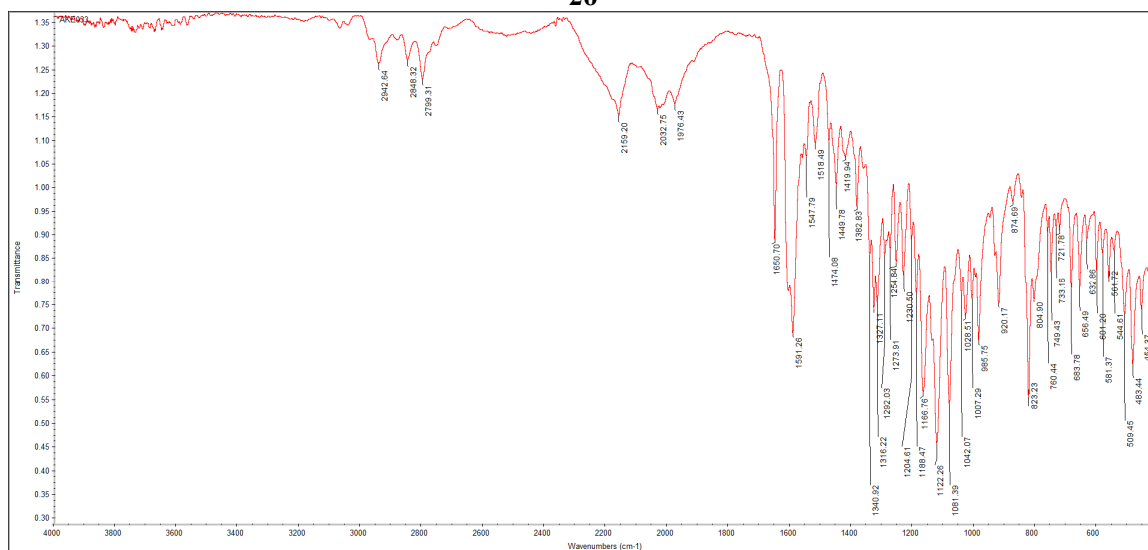

2p

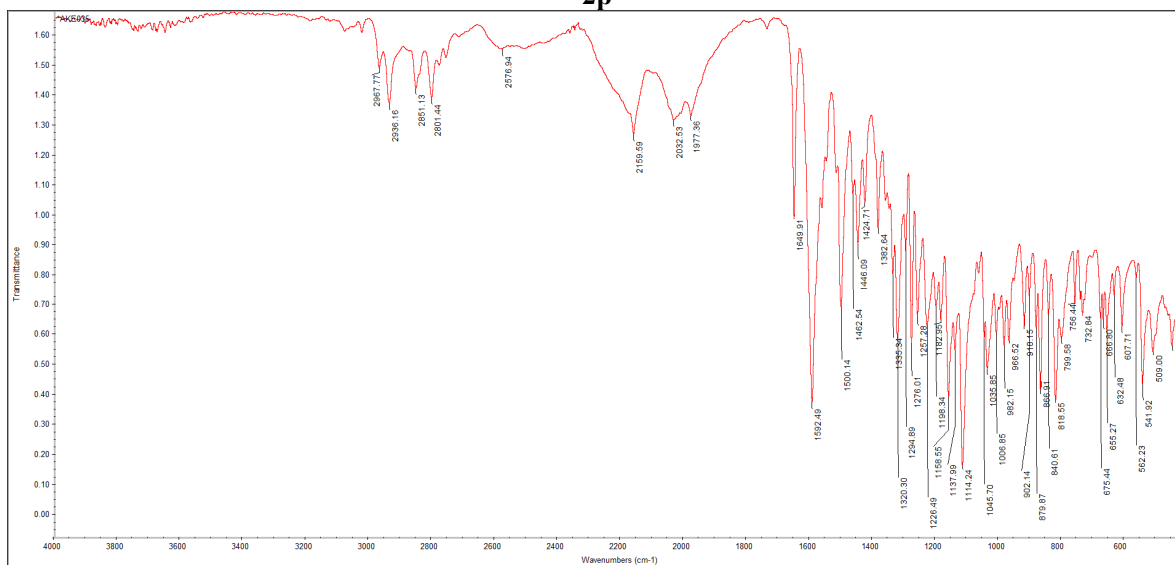

2q

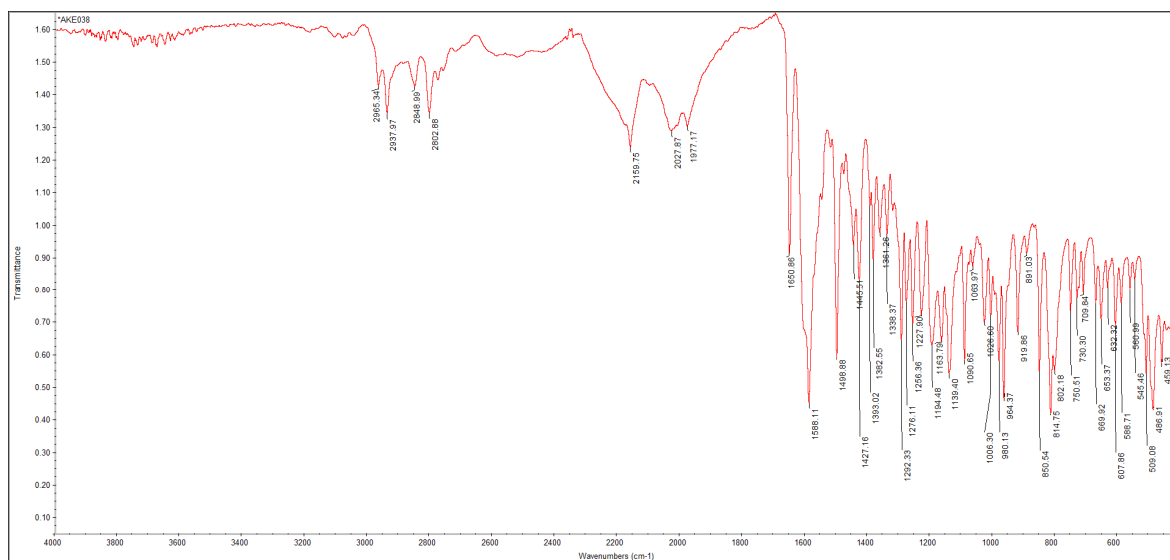



**Figure S4.** IC<sub>50</sub> curves of **2k** and **2n** against MAO-B

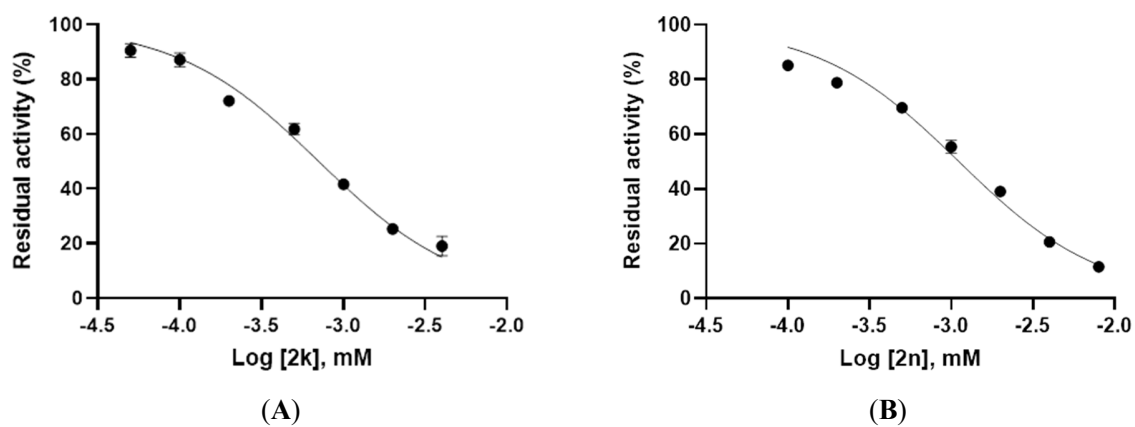

**Figure S4.** The IC<sub>50</sub> curves of **2k** (A) and **2n** (B) using GraphPad Prism version 9.3.1. The IC<sub>50</sub> of **2k** and **2n** were determined with 0.71 and 1.11  $\mu$ M, respectively.
